# Supplementary material
Source: ML conference proceedings conference paper supplement (https://aclanthology.org/2022.acl-long.470)
Supplement: software [file nl-correlations.pdf › acl-2022-code/plots/nl-correlations.pdf]

# Dutch

lstm

transformer

ppmi

0.53\*

0.74\*

lstm

0.56\*

1.00

0.75

0.50

0.25

0.00

-0.25

-0.50

-0.75

-1.00
