# Supplementary material
Source: ML conference proceedings conference paper supplement (https://aclanthology.org/2022.acl-long.470)
Supplement: software [file TSNEclusters-color-Japanese.pdf › acl-2022-code/clustering/TSNEclusters-color-Japanese.pdf]

## Japanese color

- singular vowels
- consonant-vowel unions
- singular consonant

を そ お  
ぬ む ゆ な  
み ま も ん う る  
り え や め よ ろ さ ふ  
ち か わ ら す せ  
と た く ほ  
に と の し ね  
れ て こ へ  
き い ひ は  
つ
