# Supplementary material
Source: ML conference proceedings conference paper supplement (https://aclanthology.org/2022.acl-long.470)
Supplement: software [file TSNEclusters-color-Korean.pdf › acl-2022-code/clustering/TSNEclusters-color-Korean.pdf]

- consonant
- vowel
