# Supplementary material
Source: ML conference proceedings conference paper supplement (https://aclanthology.org/2022.acl-long.470)
Supplement: software [file TSNEclusters-PPMI-ja.pdf › acl-2022-code/clustering/TSNEclusters-PPMI-ja.pdf]

# ja PPMI

- singular vowels
- consonant-vowel unions
- singular consonant

あ い う え お か き く け こ  
さ し す せ そ ち ね ぬ な に  
は へ ま み め も む ん  
や ざ だ ぢ ぢ り ろ り ら  
み け わ す な め む な お き ろ  
し づ し づ し づ し づ し づ し
