# Supplementary material
Source: ML conference proceedings conference paper supplement (https://aclanthology.org/2022.acl-long.470)

# en IPA

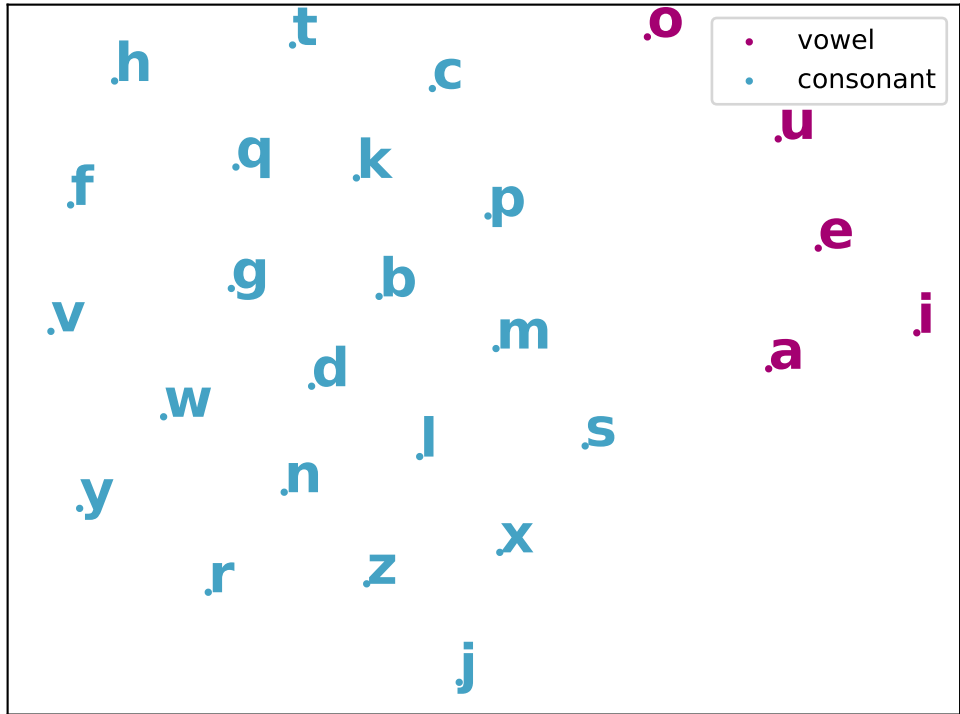

Supplement: software [file TSNEclusters-IPA-en.pdf › acl-2022-code/clustering/TSNEclusters-IPA-en.pdf]

# es IPA

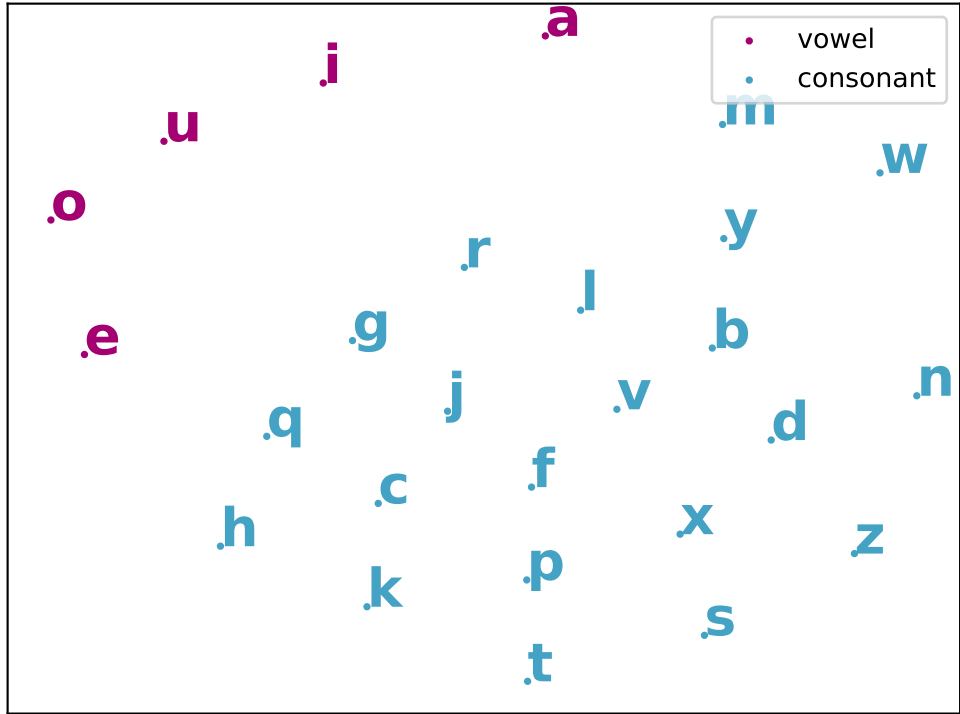

Supplement: software [file TSNEclusters-IPA-es.pdf › acl-2022-code/clustering/TSNEclusters-IPA-es.pdf]

# ja IPA

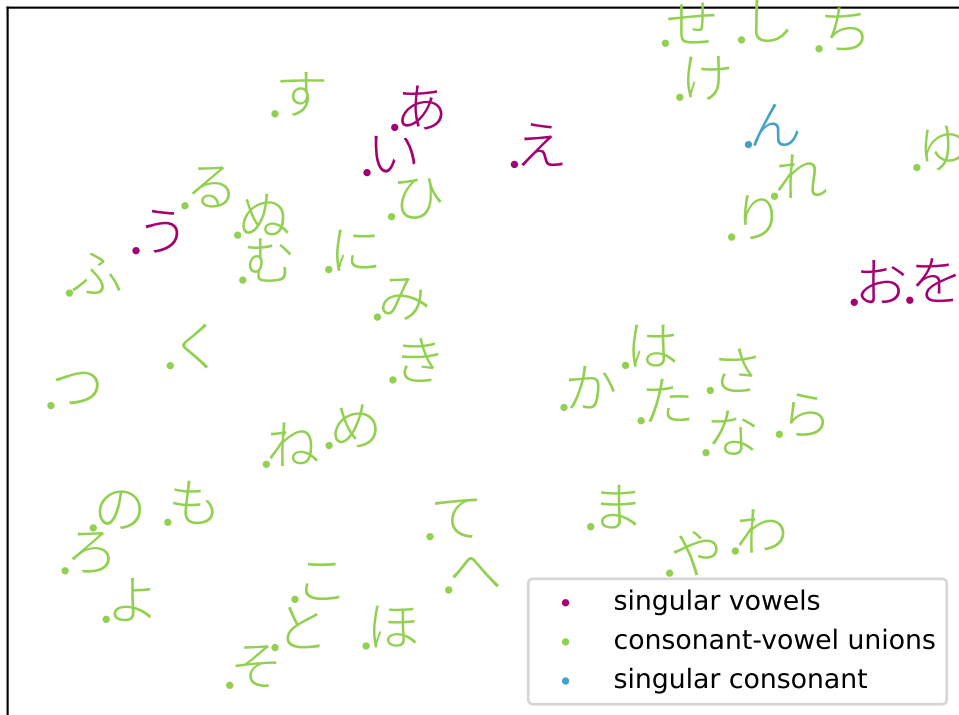

Supplement: software [file TSNEclusters-IPA-ja.pdf › acl-2022-code/clustering/TSNEclusters-IPA-ja.pdf]

# ko IPA

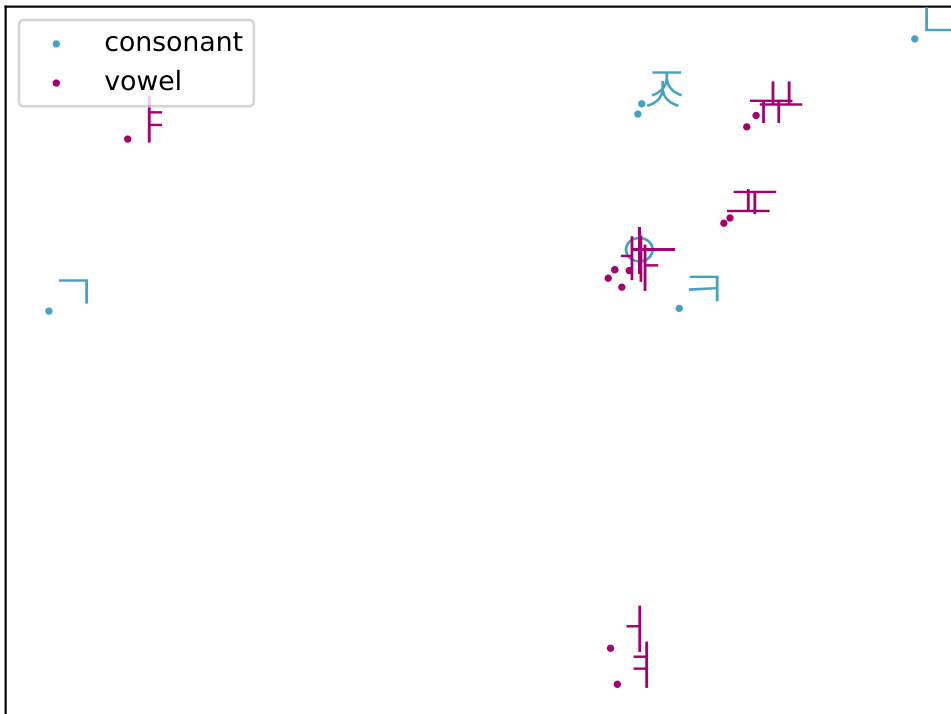

Supplement: software [file TSNEclusters-IPA-ko.pdf › acl-2022-code/clustering/TSNEclusters-IPA-ko.pdf]

# nl IPA

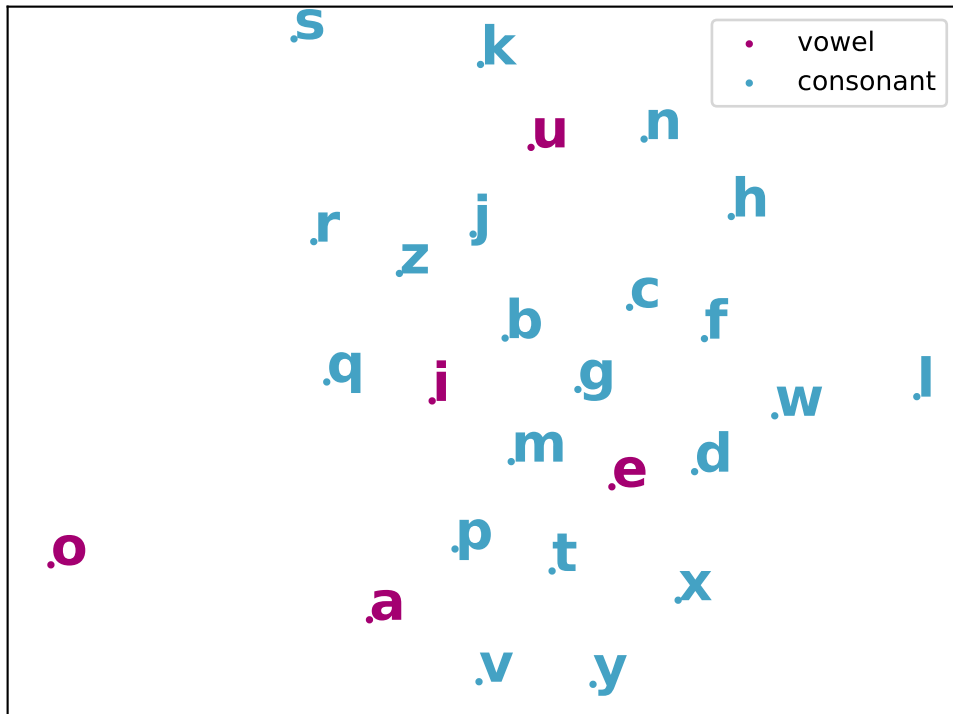

Supplement: software [file TSNEclusters-IPA-nl.pdf › acl-2022-code/clustering/TSNEclusters-IPA-nl.pdf]

# en LSTM

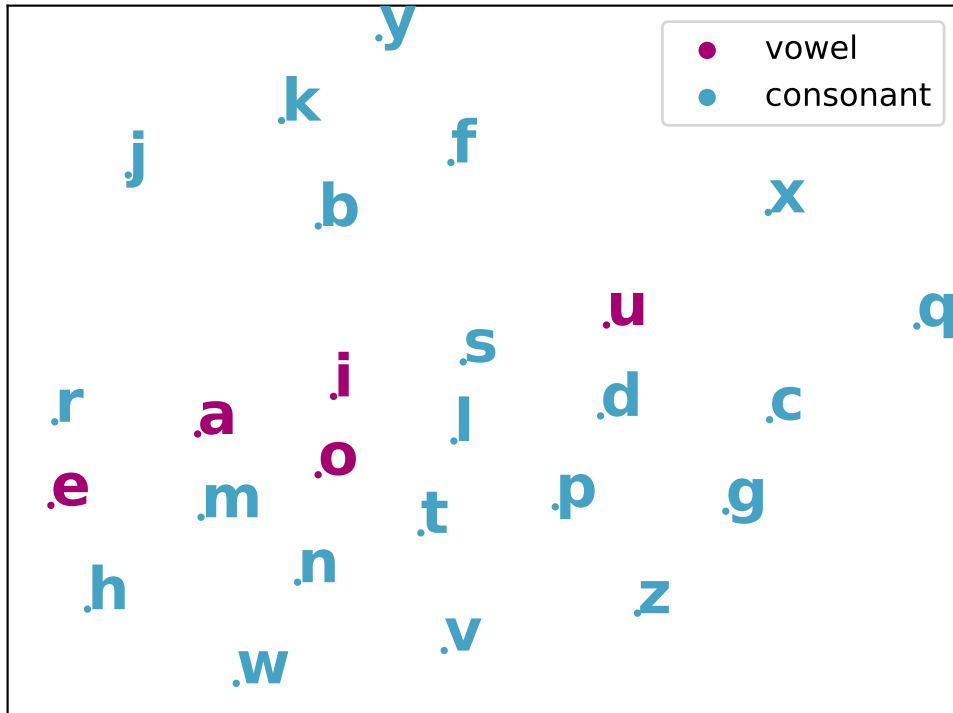

Supplement: software [file TSNEclusters-LSTM-en.pdf › acl-2022-code/clustering/TSNEclusters-LSTM-en.pdf]

# es LSTM

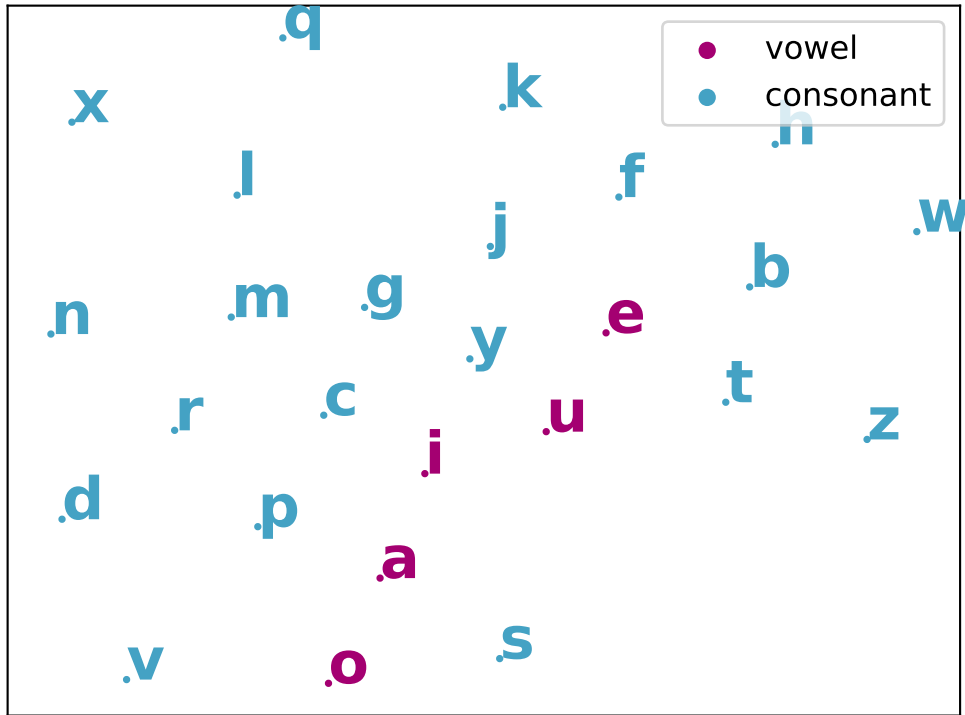

Supplement: software [file TSNEclusters-LSTM-es.pdf › acl-2022-code/clustering/TSNEclusters-LSTM-es.pdf]

# ja LSTM

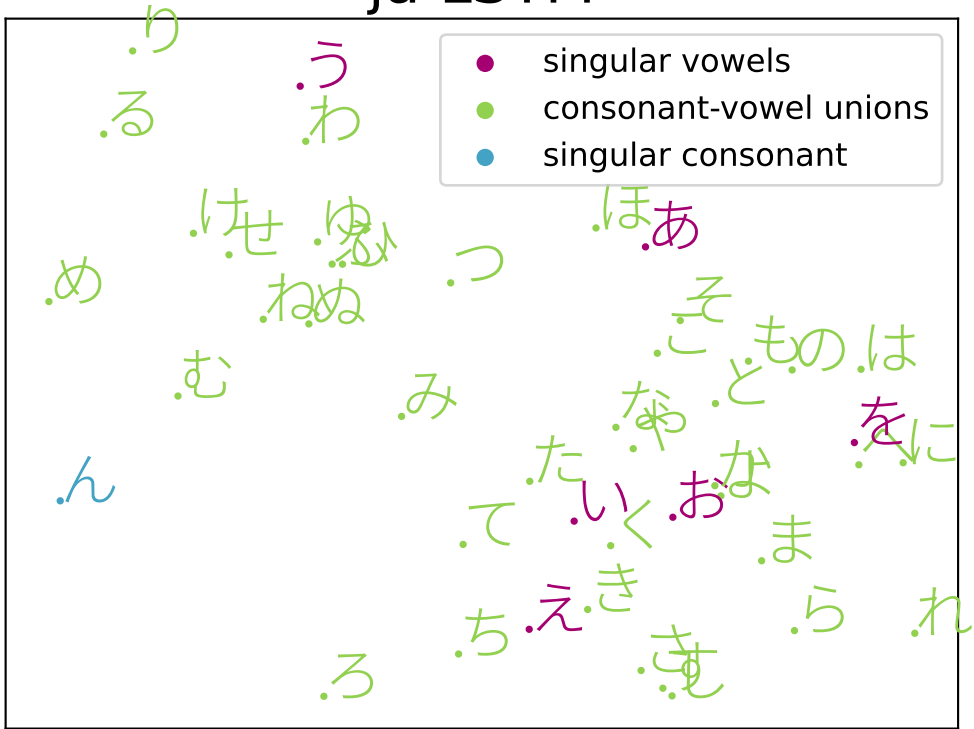

Supplement: software [file TSNEclusters-LSTM-ja.pdf › acl-2022-code/clustering/TSNEclusters-LSTM-ja.pdf]

.

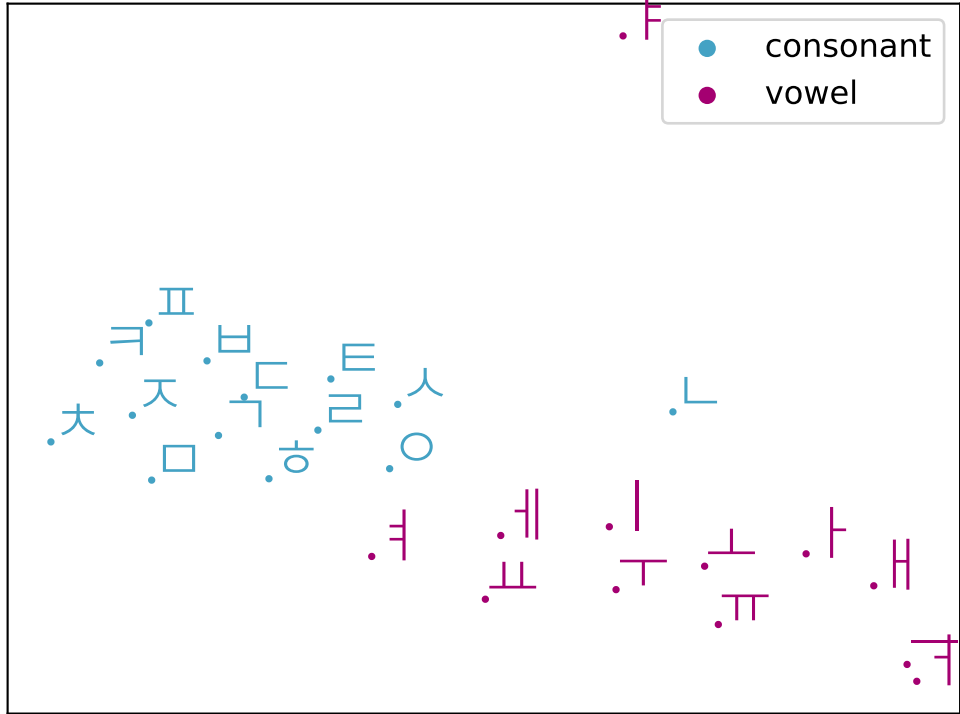

Supplement: software [file TSNEclusters-LSTM-ko.pdf › acl-2022-code/clustering/TSNEclusters-LSTM-ko.pdf]

# nl LSTM

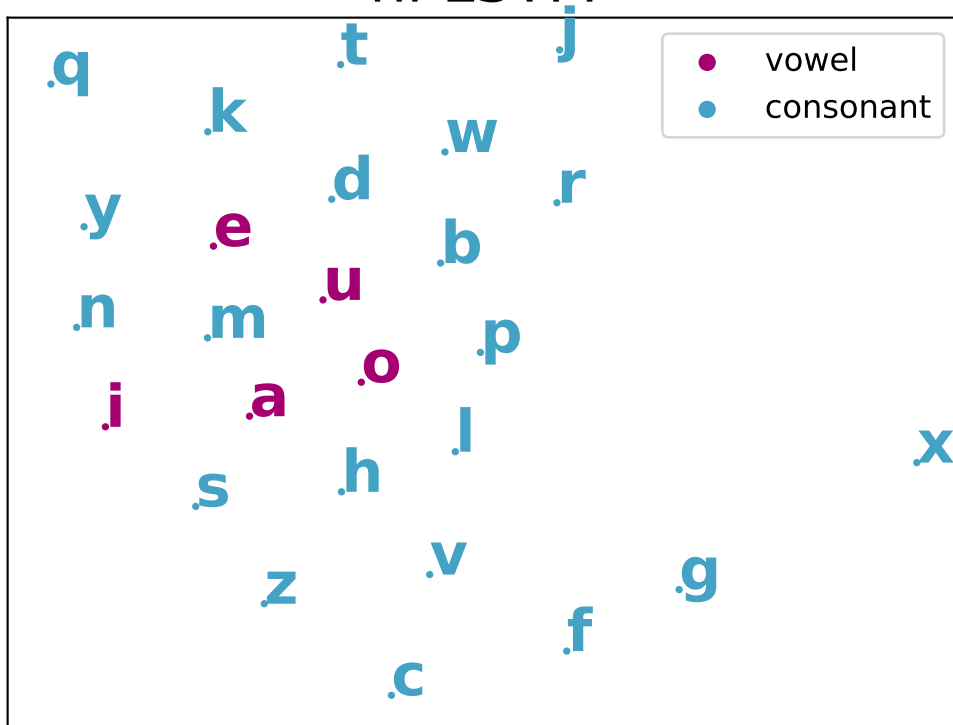

Supplement: software [file TSNEclusters-LSTM-nl.pdf › acl-2022-code/clustering/TSNEclusters-LSTM-nl.pdf]

# en PPMI

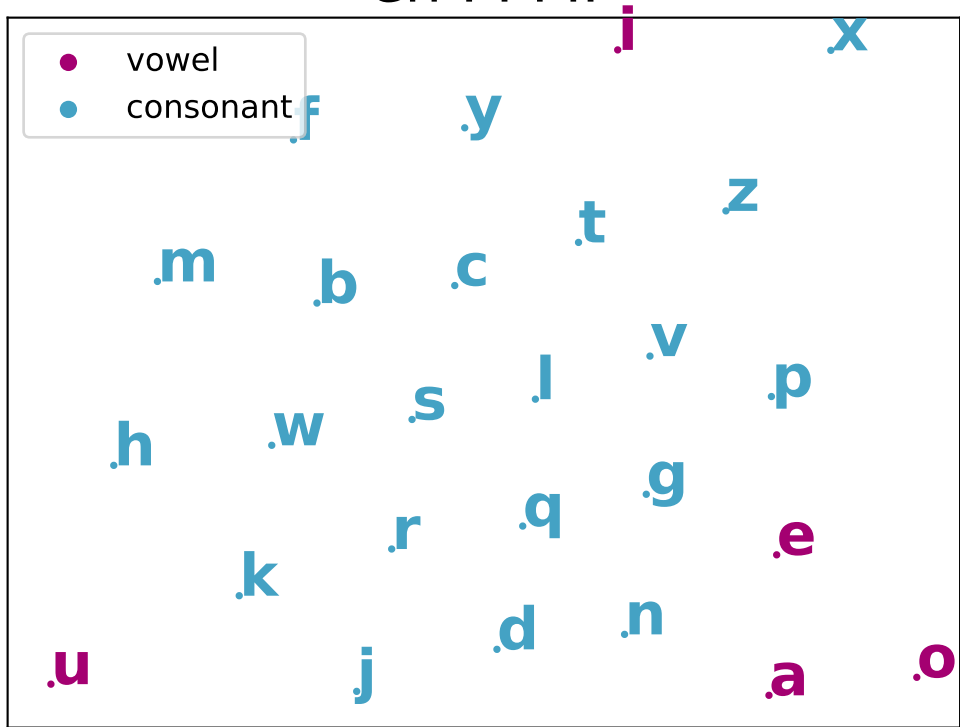

Supplement: software [file TSNEclusters-PPMI-en.pdf › acl-2022-code/clustering/TSNEclusters-PPMI-en.pdf]

# es PPMI

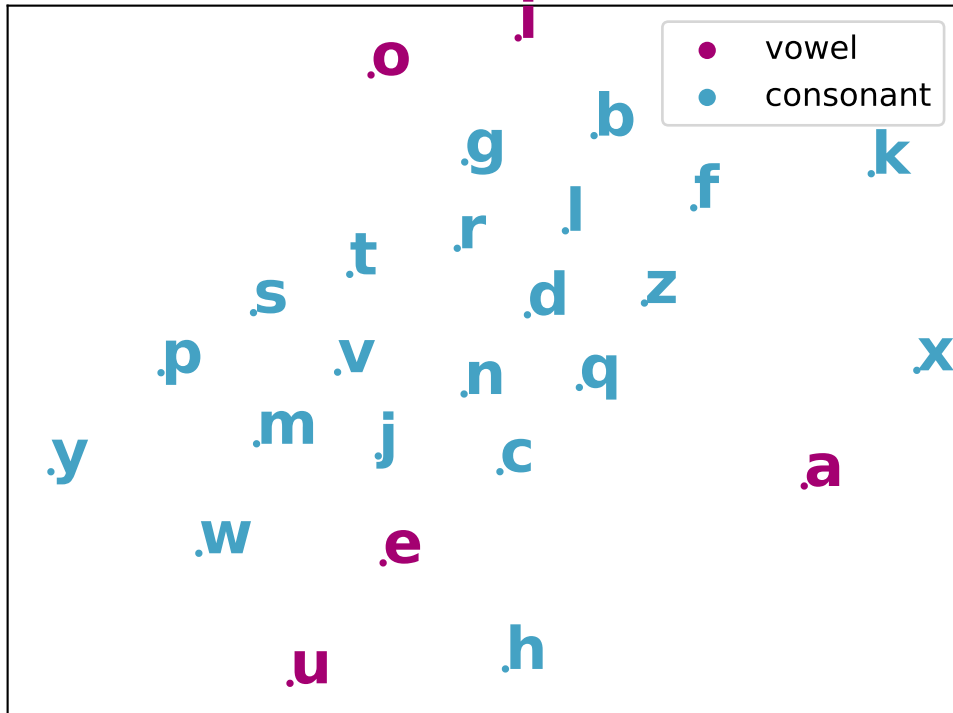

Supplement: software [file TSNEclusters-PPMI-es.pdf › acl-2022-code/clustering/TSNEclusters-PPMI-es.pdf]

## ko PPMI

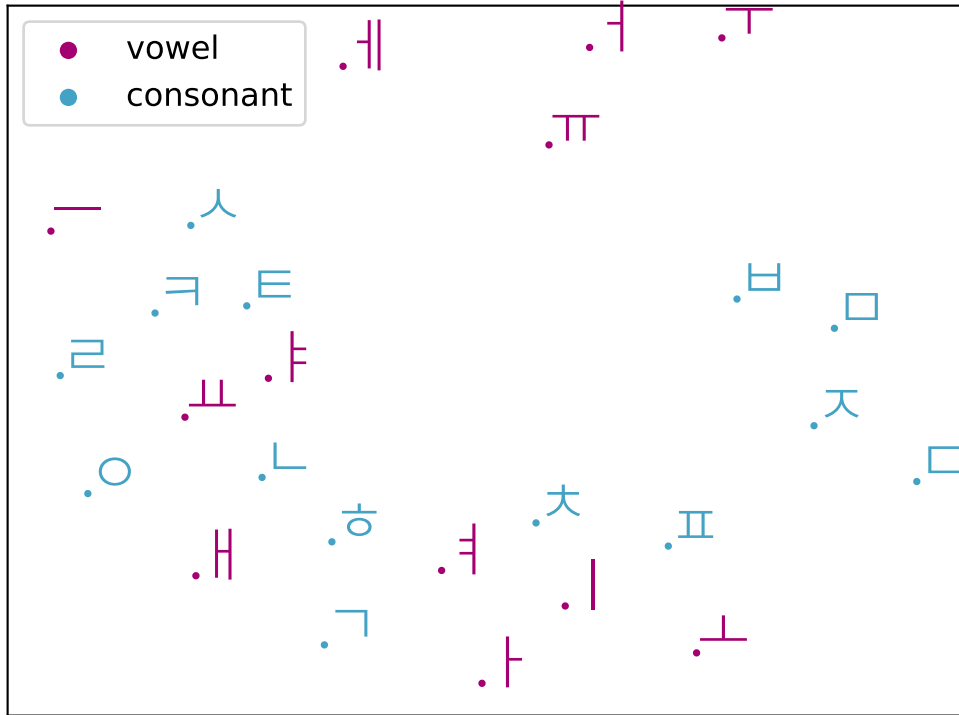

Supplement: software [file TSNEclusters-PPMI-ko.pdf › acl-2022-code/clustering/TSNEclusters-PPMI-ko.pdf]

# nl PPMI

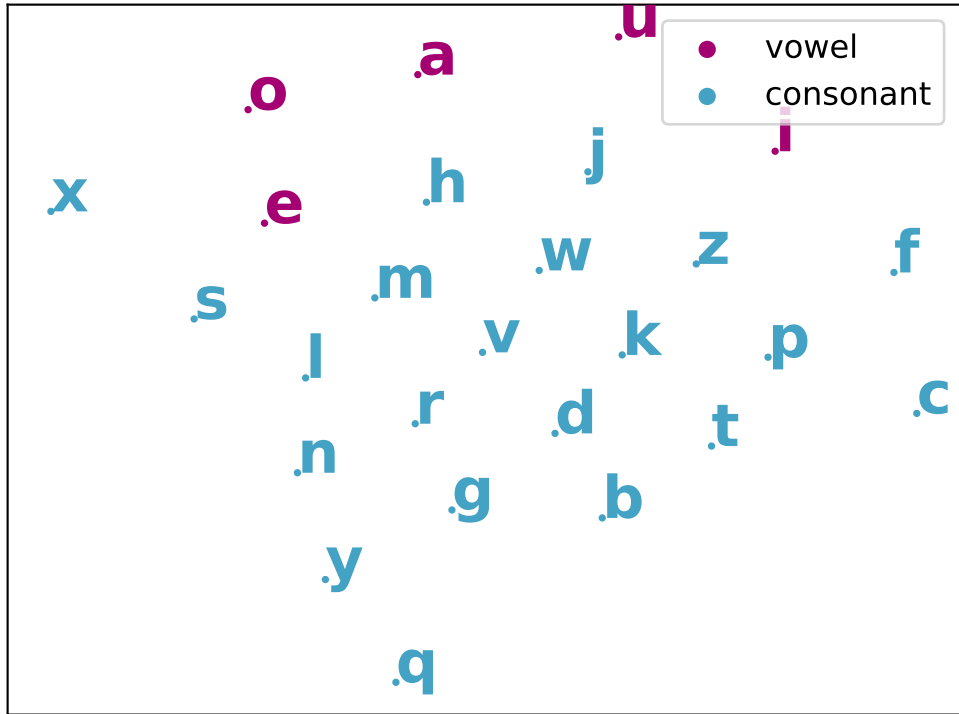

Supplement: software [file TSNEclusters-PPMI-nl.pdf › acl-2022-code/clustering/TSNEclusters-PPMI-nl.pdf]

## en biLSTM

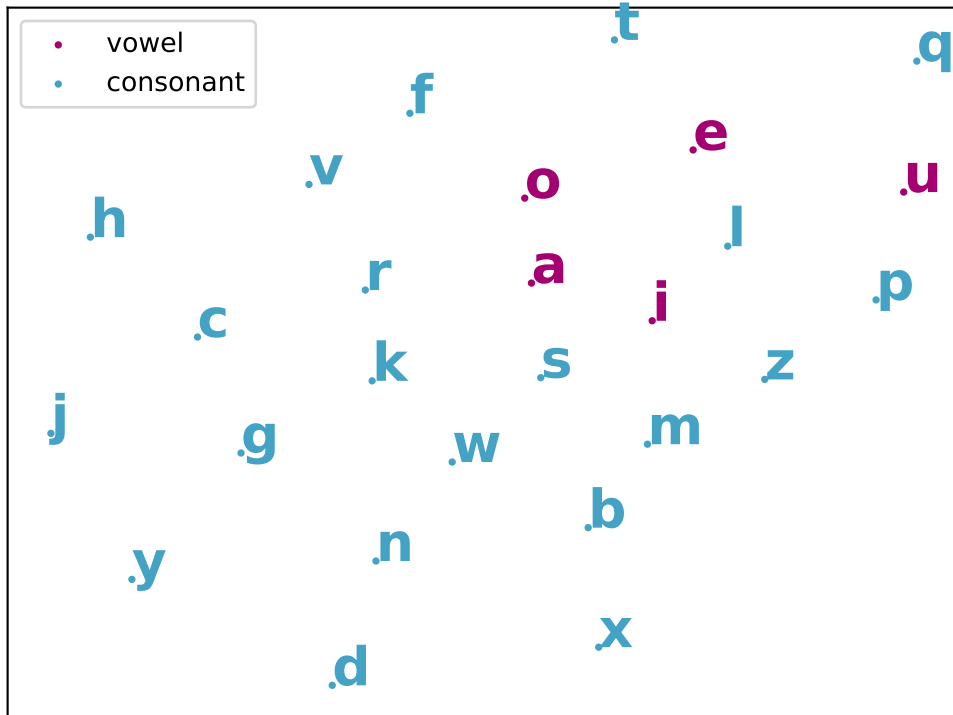

Supplement: software [file TSNEclusters-biLSTM-en.pdf › acl-2022-code/clustering/TSNEclusters-biLSTM-en.pdf]

## es biLSTM

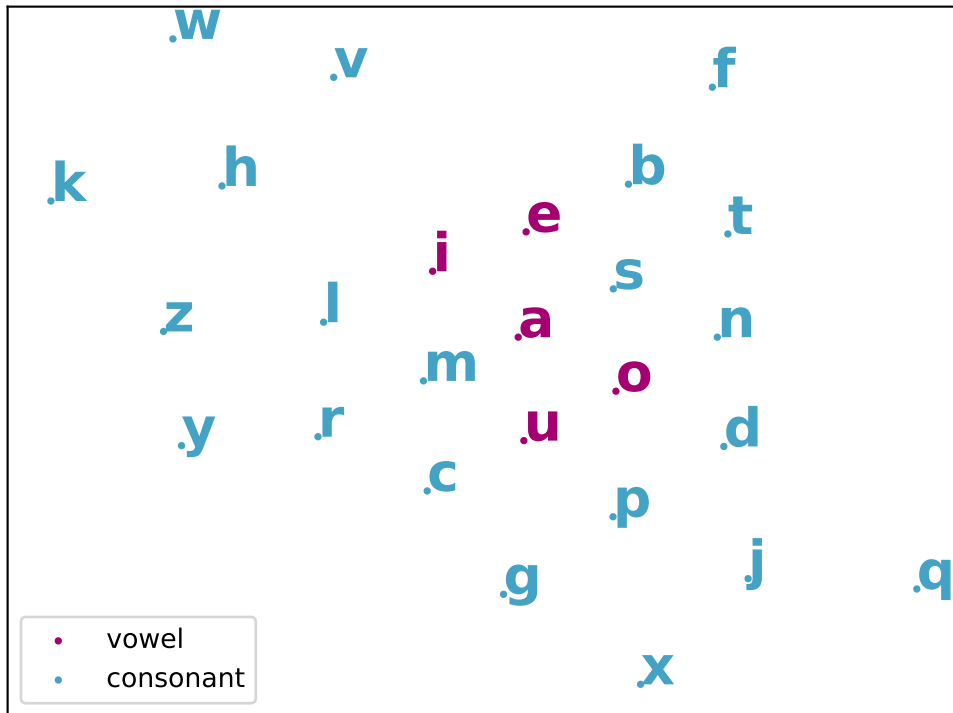

Supplement: software [file TSNEclusters-biLSTM-es.pdf › acl-2022-code/clustering/TSNEclusters-biLSTM-es.pdf]

# ja biLSTM

- singular vowels
- consonant-vowel unions
- singular consonant

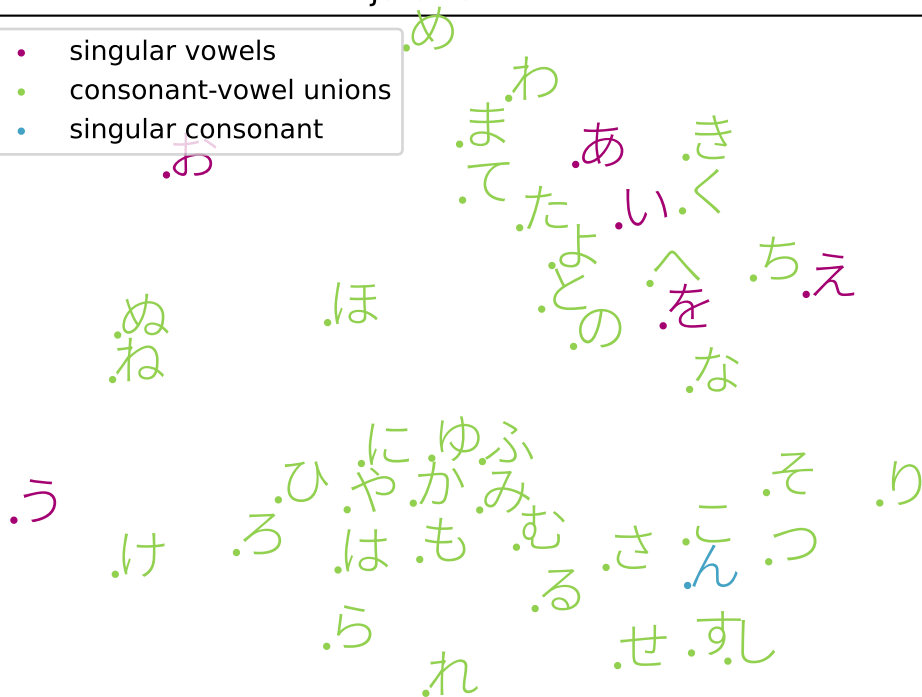

Supplement: software [file TSNEclusters-biLSTM-ja.pdf › acl-2022-code/clustering/TSNEclusters-biLSTM-ja.pdf]

## ko biLSTM

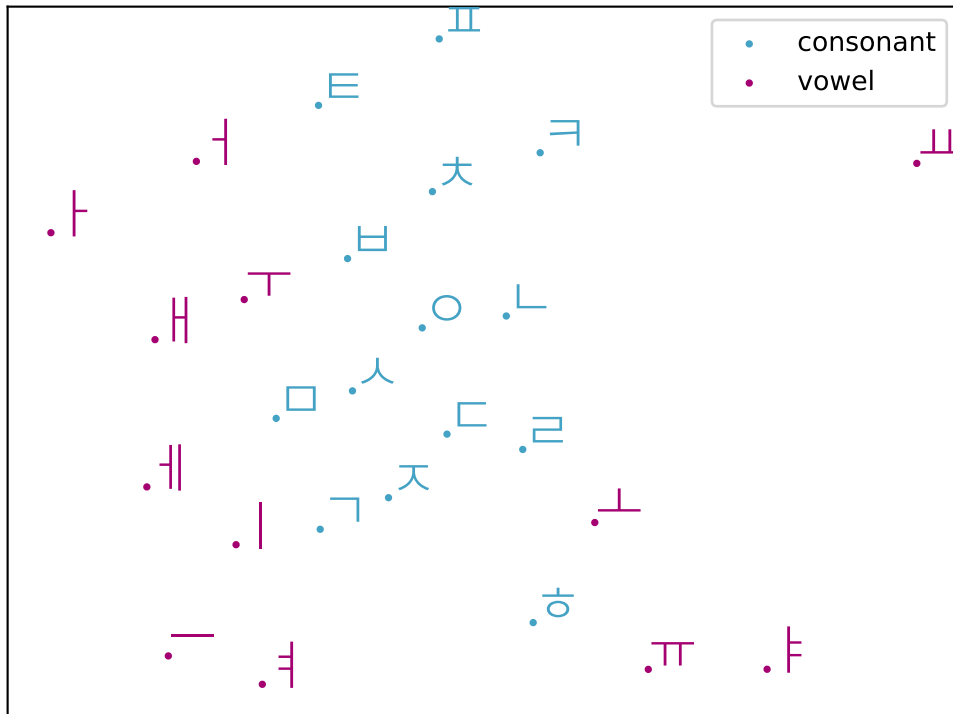

Supplement: software [file TSNEclusters-biLSTM-ko.pdf › acl-2022-code/clustering/TSNEclusters-biLSTM-ko.pdf]

# nl biLSTM

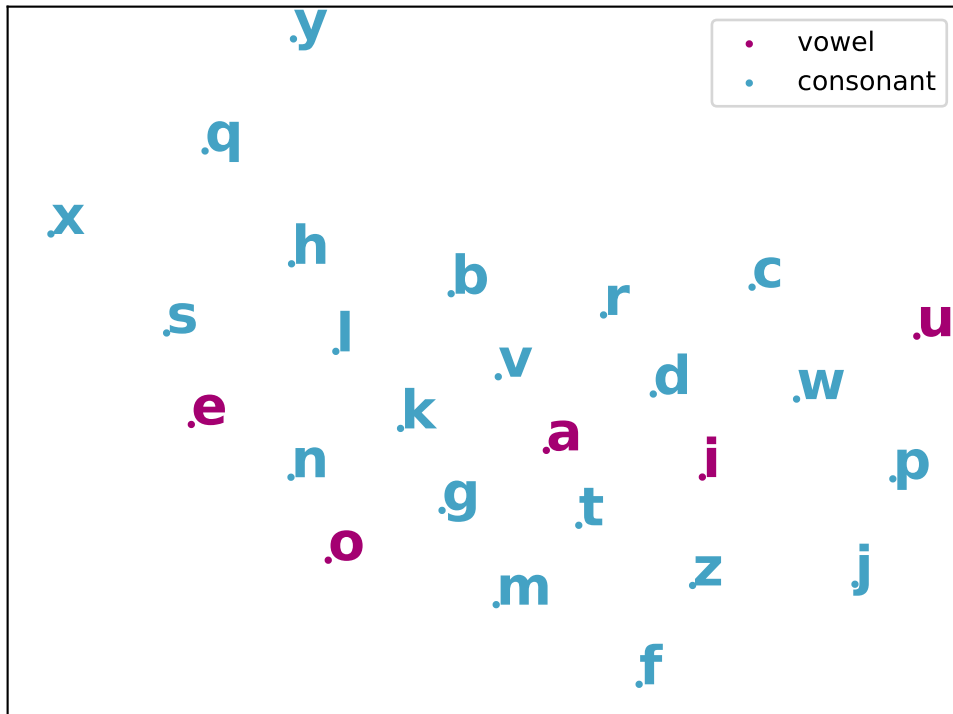

Supplement: software [file TSNEclusters-biLSTM-nl.pdf › acl-2022-code/clustering/TSNEclusters-biLSTM-nl.pdf]

# Dutch color

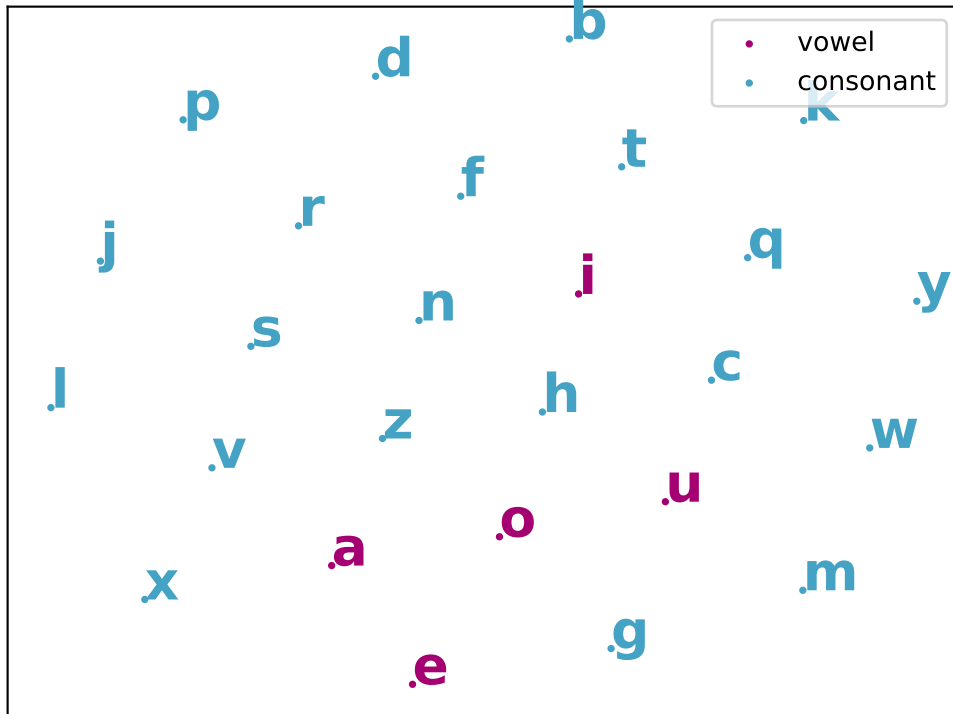

Supplement: software [file TSNEclusters-color-Dutch.pdf › acl-2022-code/clustering/TSNEclusters-color-Dutch.pdf]

# English color



Supplement: software [file TSNEclusters-color-English.pdf › acl-2022-code/clustering/TSNEclusters-color-English.pdf]

## Spanish color



Supplement: software [file TSNEclusters-color-Spanish.pdf › acl-2022-code/clustering/TSNEclusters-color-Spanish.pdf]

en color

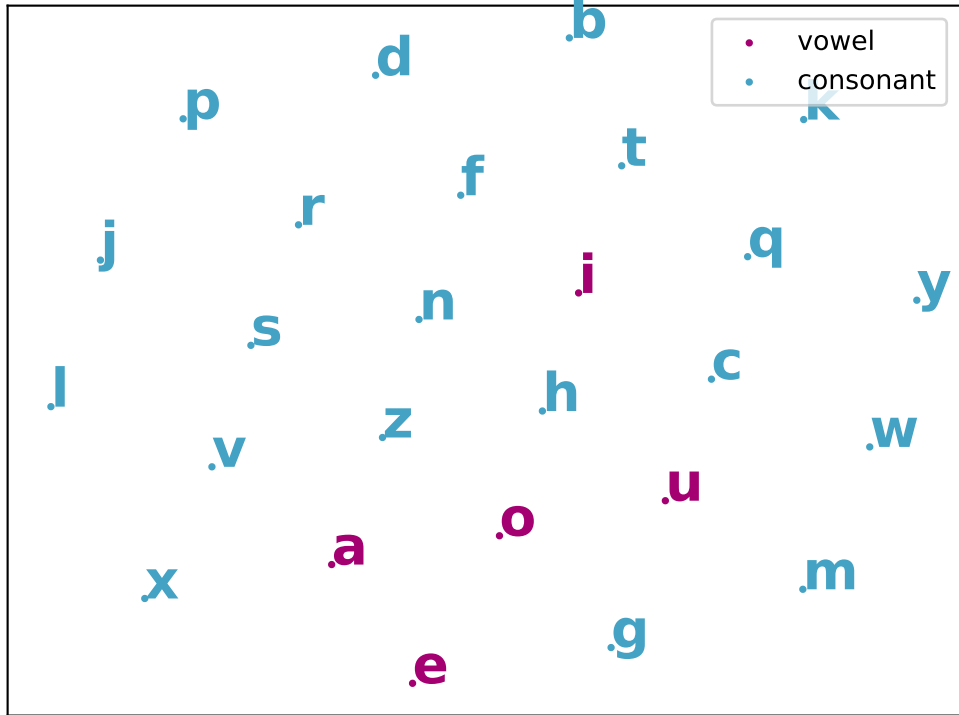

Supplement: software [file TSNEclusters-color-en.pdf › acl-2022-code/clustering/TSNEclusters-color-en.pdf]

es color

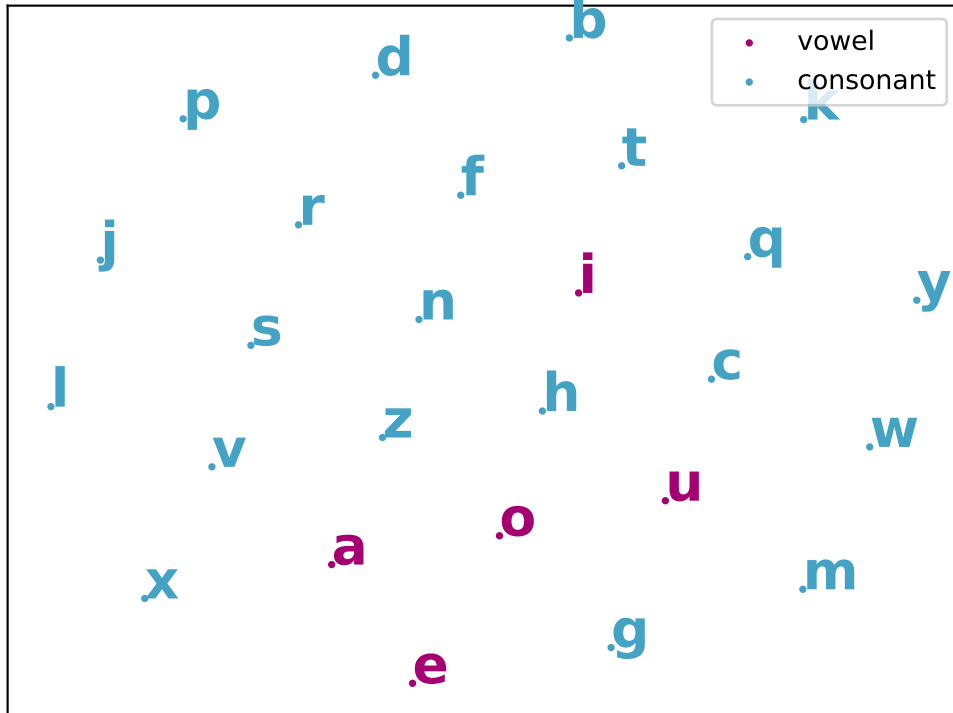

Supplement: software [file TSNEclusters-color-es.pdf › acl-2022-code/clustering/TSNEclusters-color-es.pdf]

## ko color

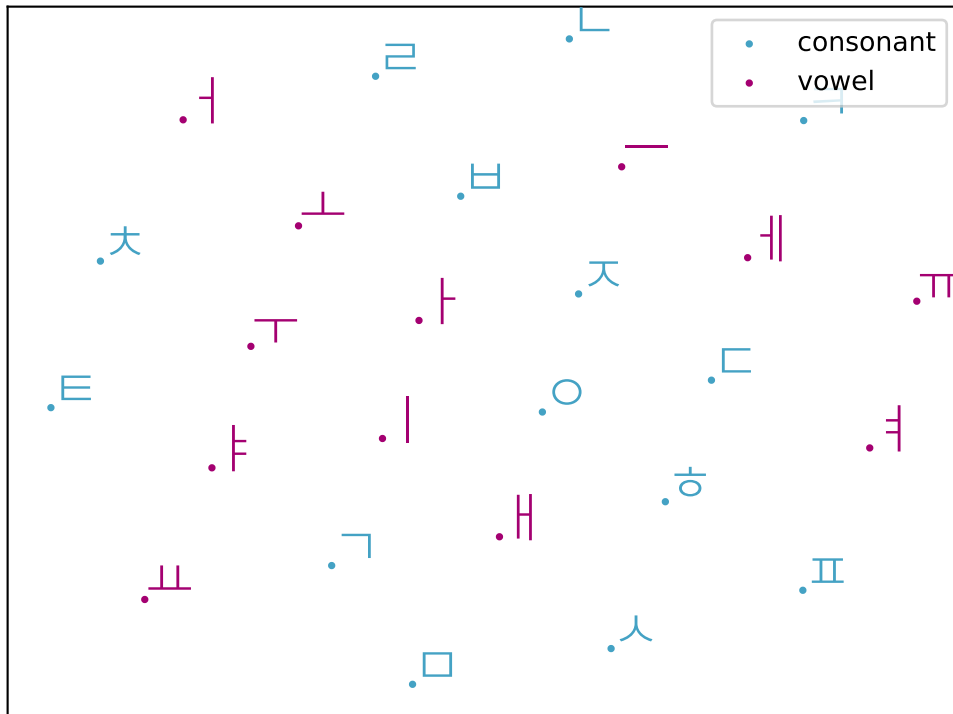

Supplement: software [file TSNEclusters-color-ko.pdf › acl-2022-code/clustering/TSNEclusters-color-ko.pdf]

nl color



Supplement: software [file TSNEclusters-color-nl.pdf › acl-2022-code/clustering/TSNEclusters-color-nl.pdf]

en shape

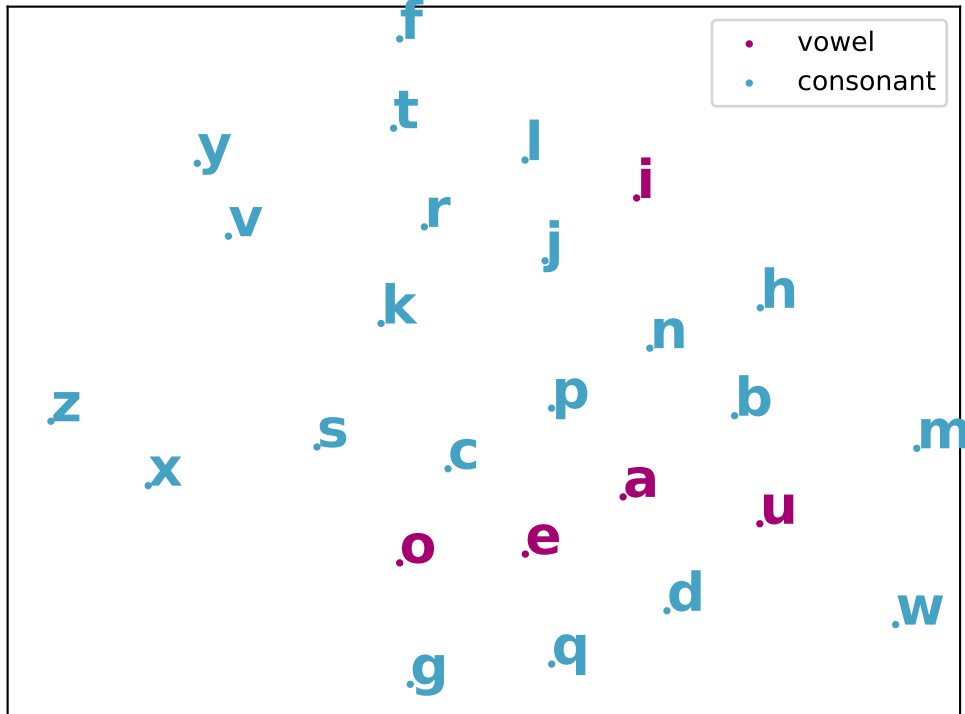

Supplement: software [file TSNEclusters-shape-en.pdf › acl-2022-code/clustering/TSNEclusters-shape-en.pdf]

# es shape

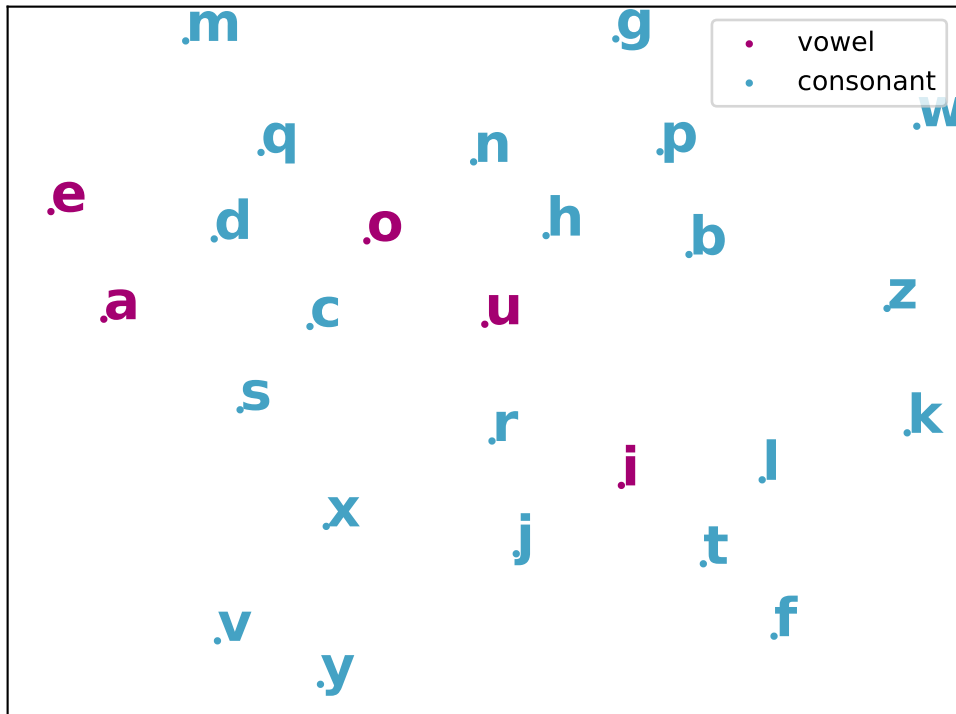

Supplement: software [file TSNEclusters-shape-es.pdf › acl-2022-code/clustering/TSNEclusters-shape-es.pdf]

# ja shape

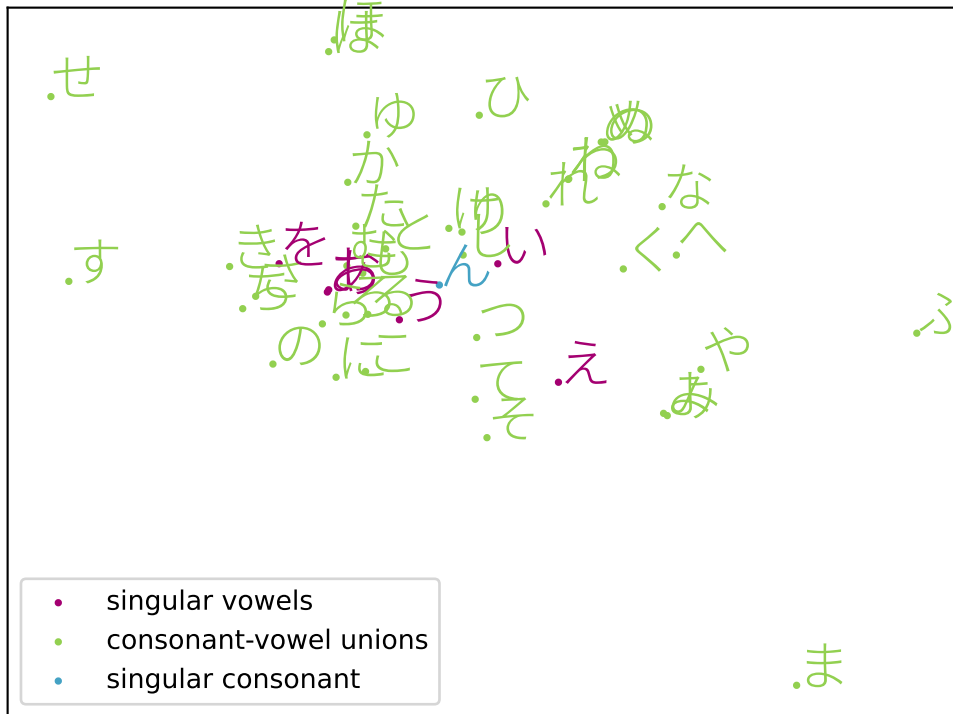

Supplement: software [file TSNEclusters-shape-ja.pdf › acl-2022-code/clustering/TSNEclusters-shape-ja.pdf]

## ko shape

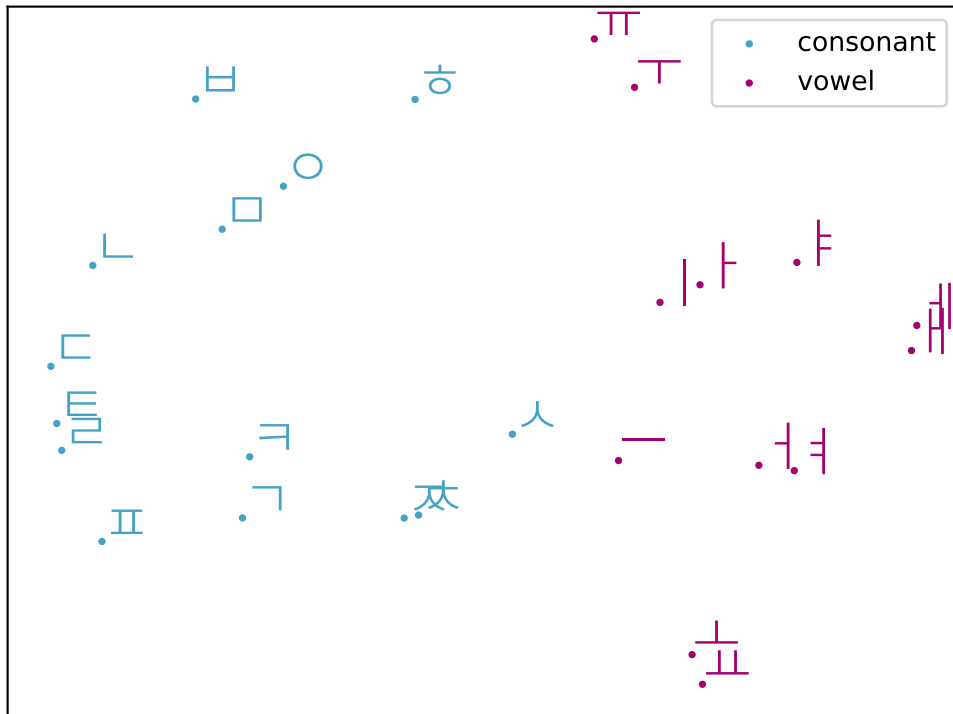

Supplement: software [file TSNEclusters-shape-ko.pdf › acl-2022-code/clustering/TSNEclusters-shape-ko.pdf]

nl shape

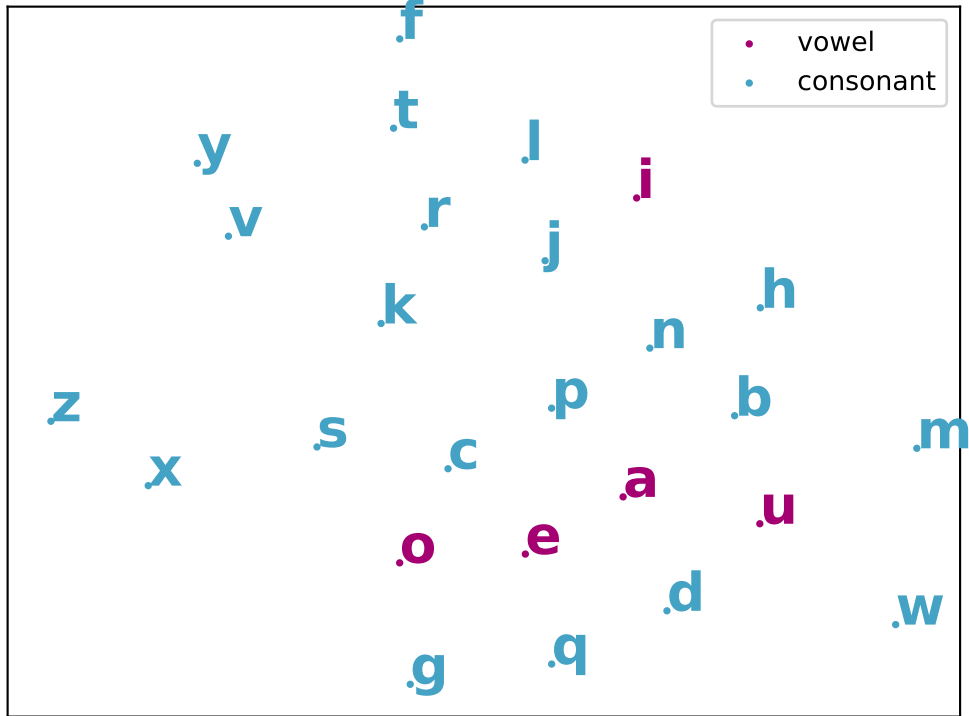

Supplement: software [file TSNEclusters-shape-nl.pdf › acl-2022-code/clustering/TSNEclusters-shape-nl.pdf]

# en Transformer

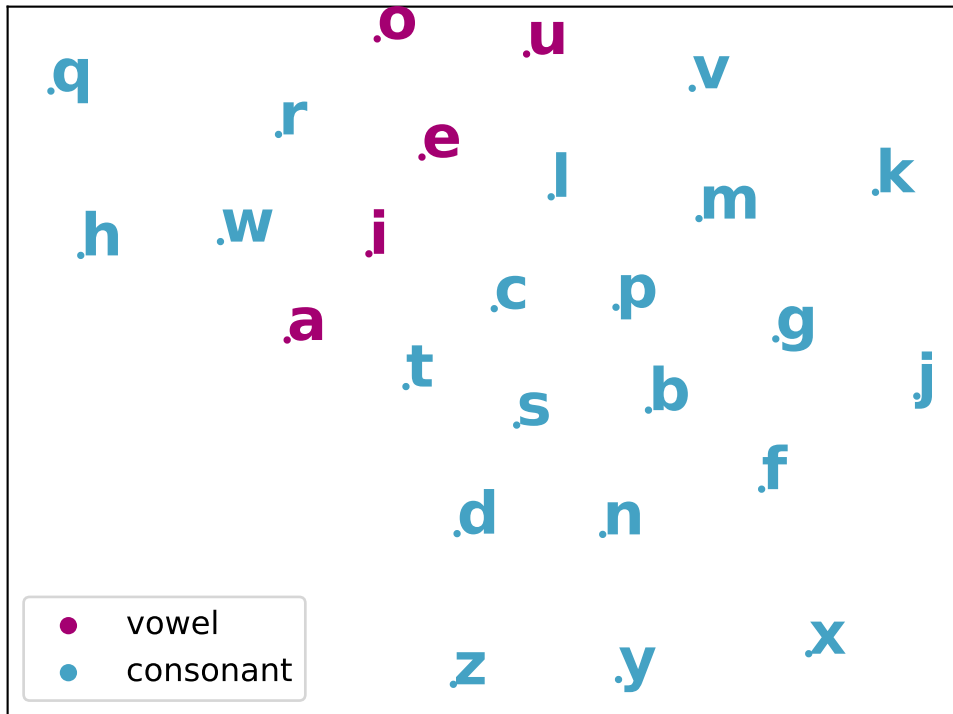

Supplement: software [file TSNEclusters-transformer-en.pdf › acl-2022-code/clustering/TSNEclusters-transformer-en.pdf]

# es Transformer

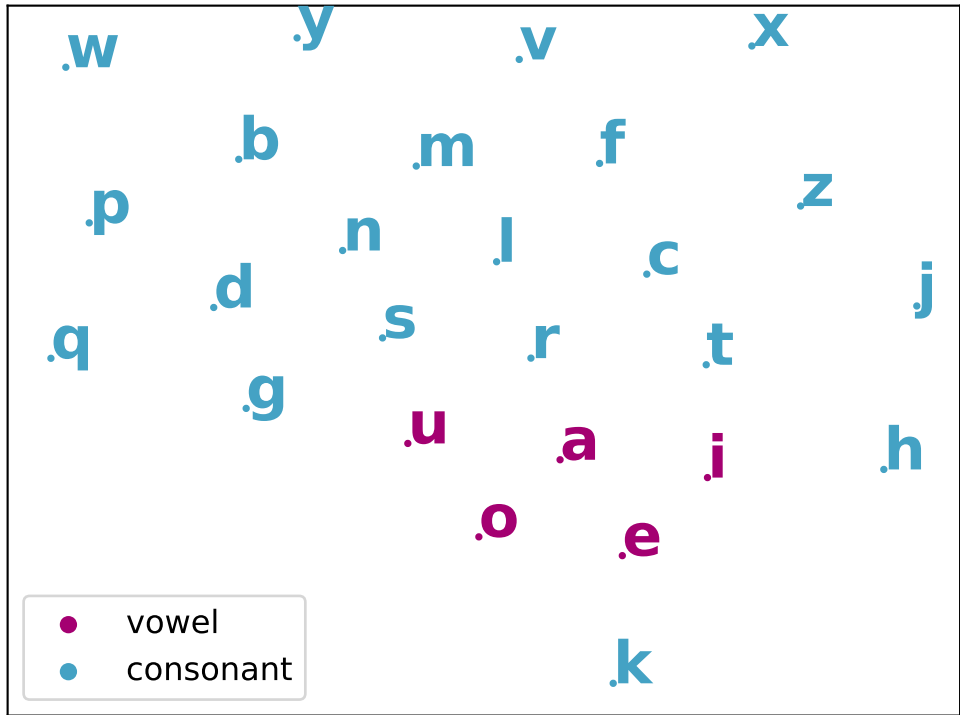

Supplement: software [file TSNEclusters-transformer-es.pdf › acl-2022-code/clustering/TSNEclusters-transformer-es.pdf]

# ja Transformer

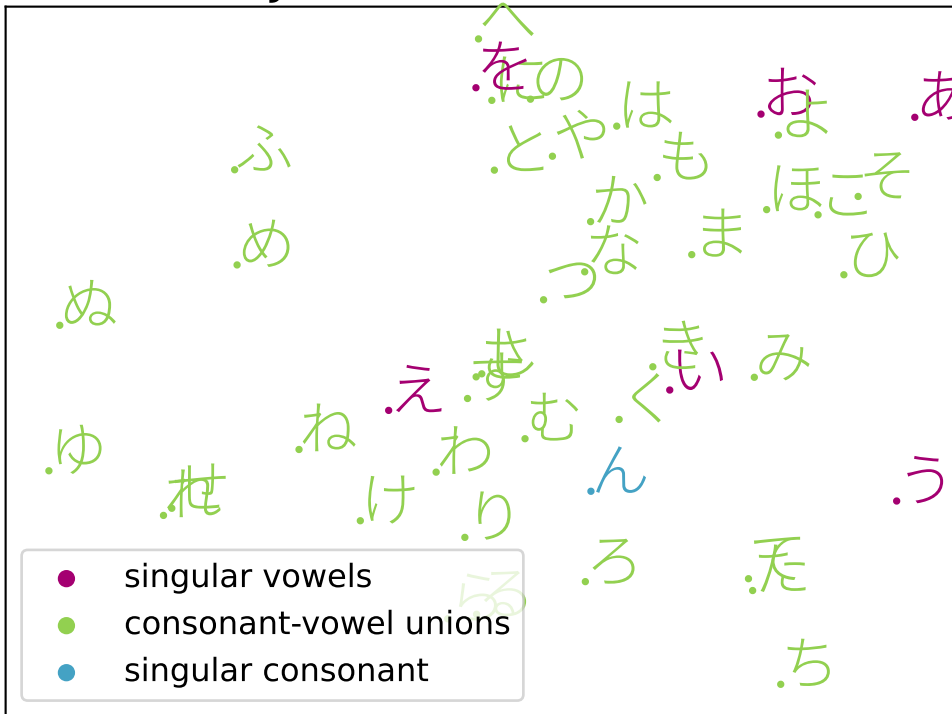

Supplement: software [file TSNEclusters-transformer-ja.pdf › acl-2022-code/clustering/TSNEclusters-transformer-ja.pdf]

# ko Transformer

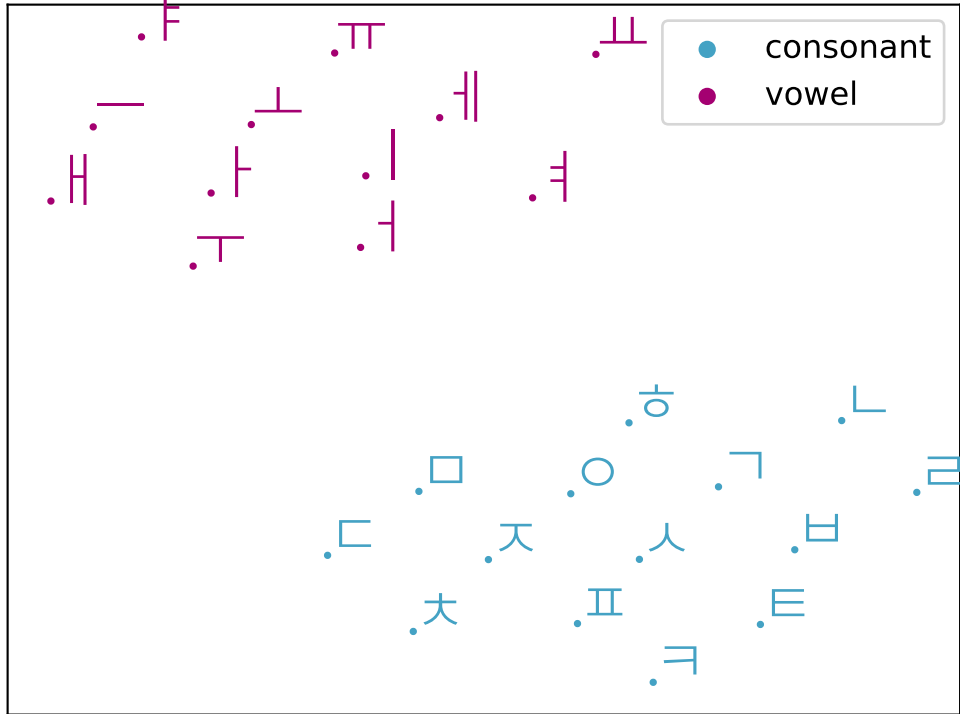

Supplement: software [file TSNEclusters-transformer-ko.pdf › acl-2022-code/clustering/TSNEclusters-transformer-ko.pdf]

# nl Transformer

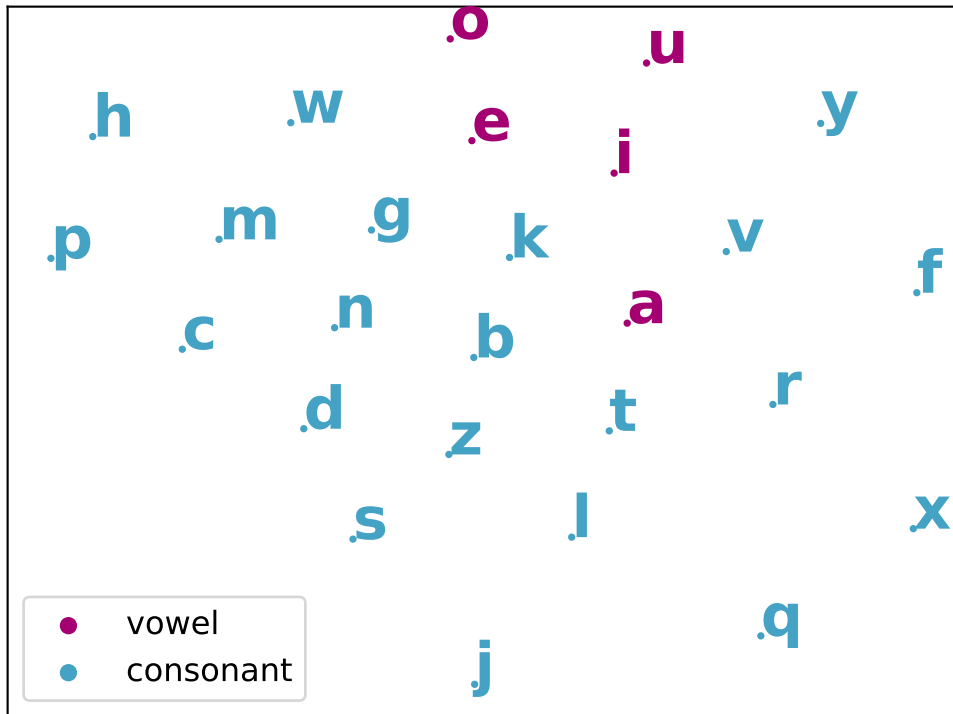

Supplement: software [file TSNEclusters-transformer-nl.pdf › acl-2022-code/clustering/TSNEclusters-transformer-nl.pdf]

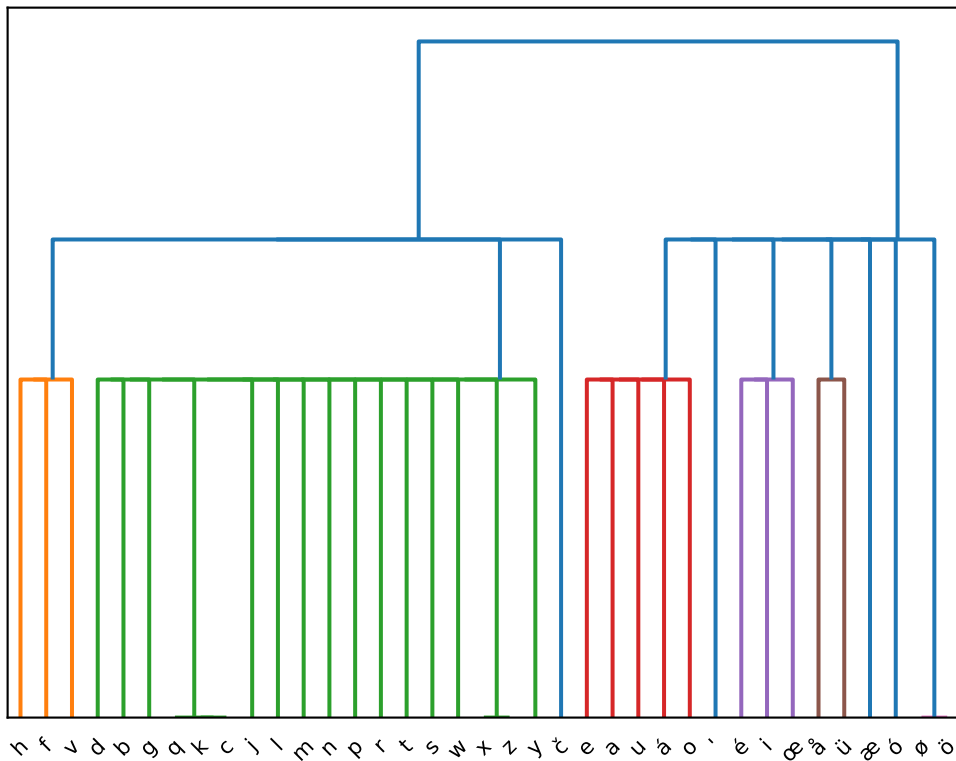

Supplement: software [file hierarchical-clusters-IPA-en.pdf › acl-2022-code/clustering/hierarchical-clusters-IPA-en.pdf]

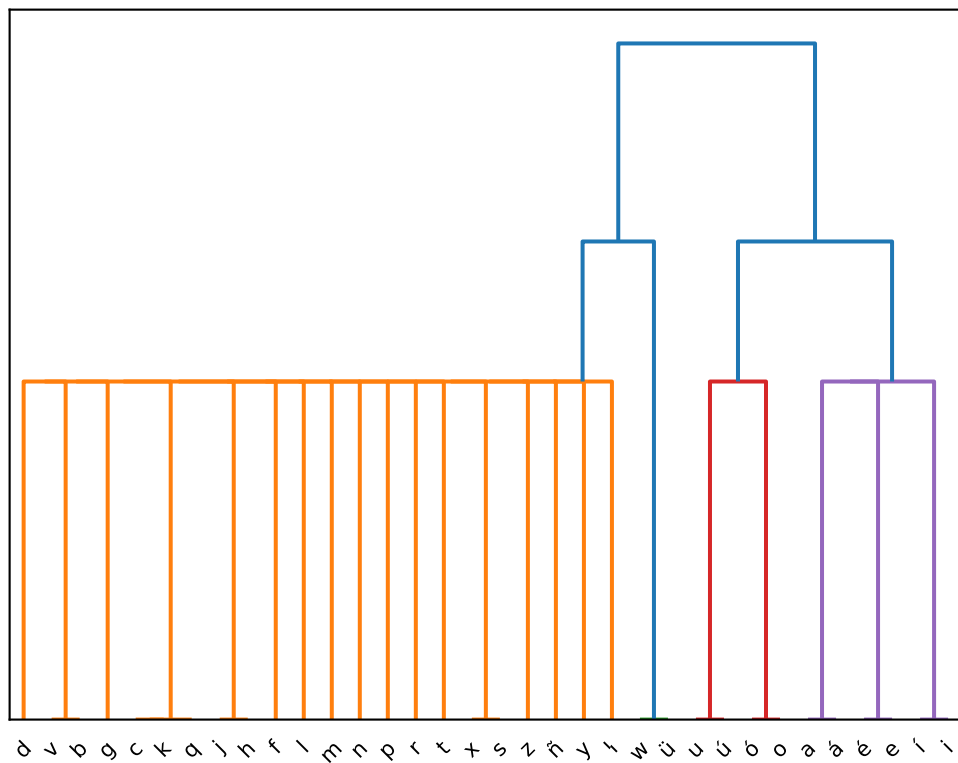

Supplement: software [file hierarchical-clusters-IPA-es.pdf › acl-2022-code/clustering/hierarchical-clusters-IPA-es.pdf]

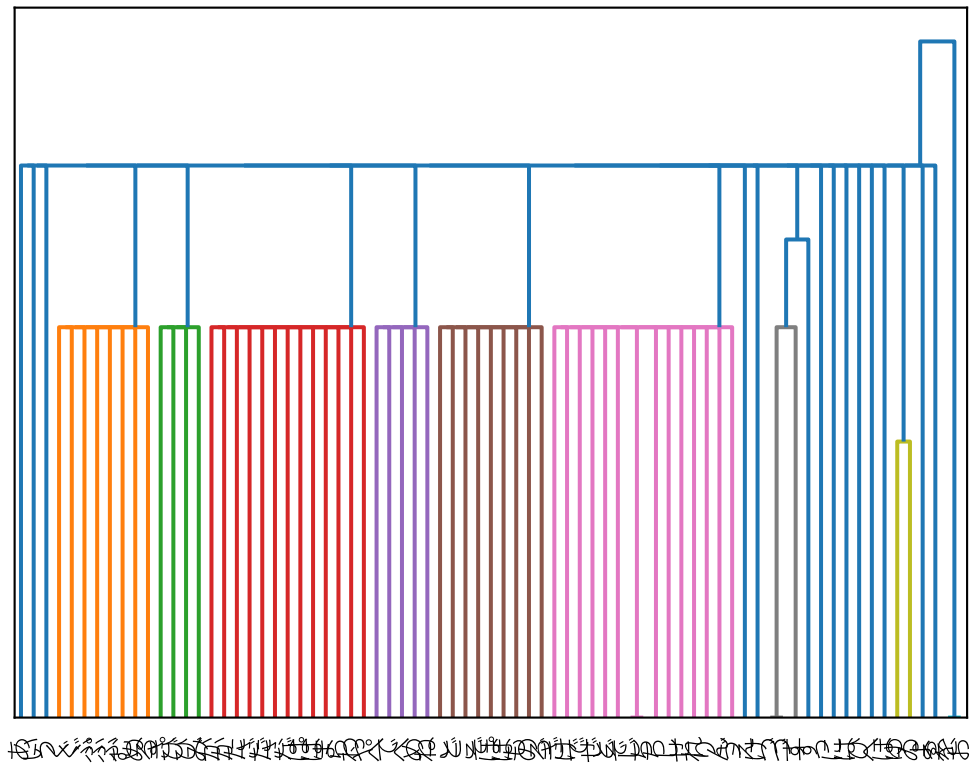

Supplement: software [file hierarchical-clusters-IPA-ja.pdf › acl-2022-code/clustering/hierarchical-clusters-IPA-ja.pdf]

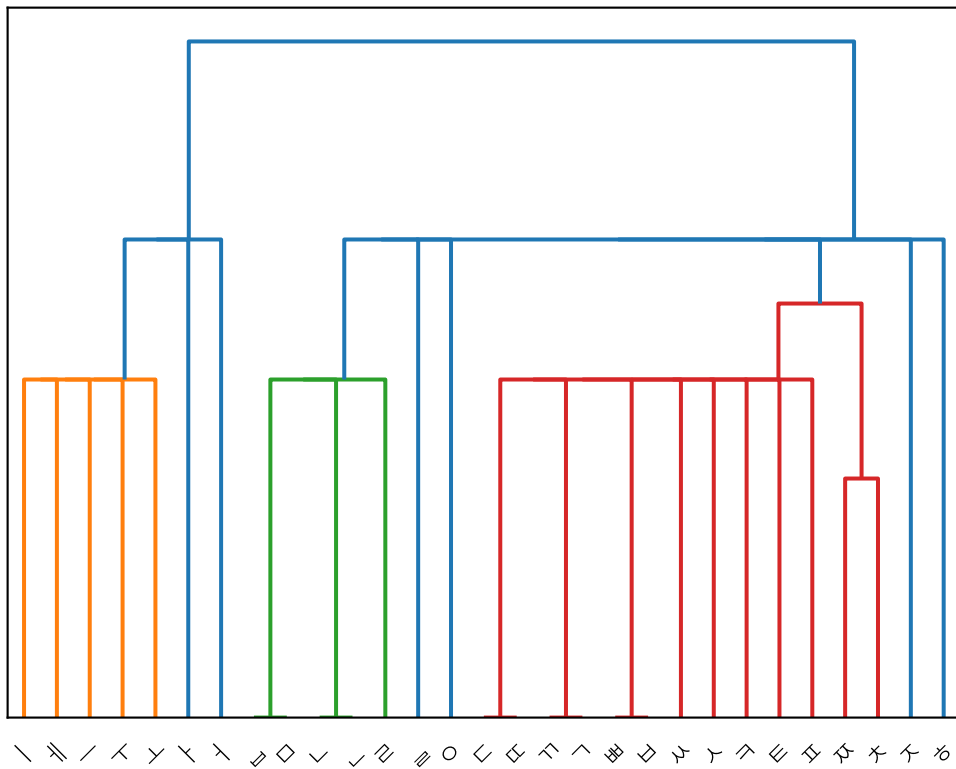

Supplement: software [file hierarchical-clusters-IPA-ko.pdf › acl-2022-code/clustering/hierarchical-clusters-IPA-ko.pdf]

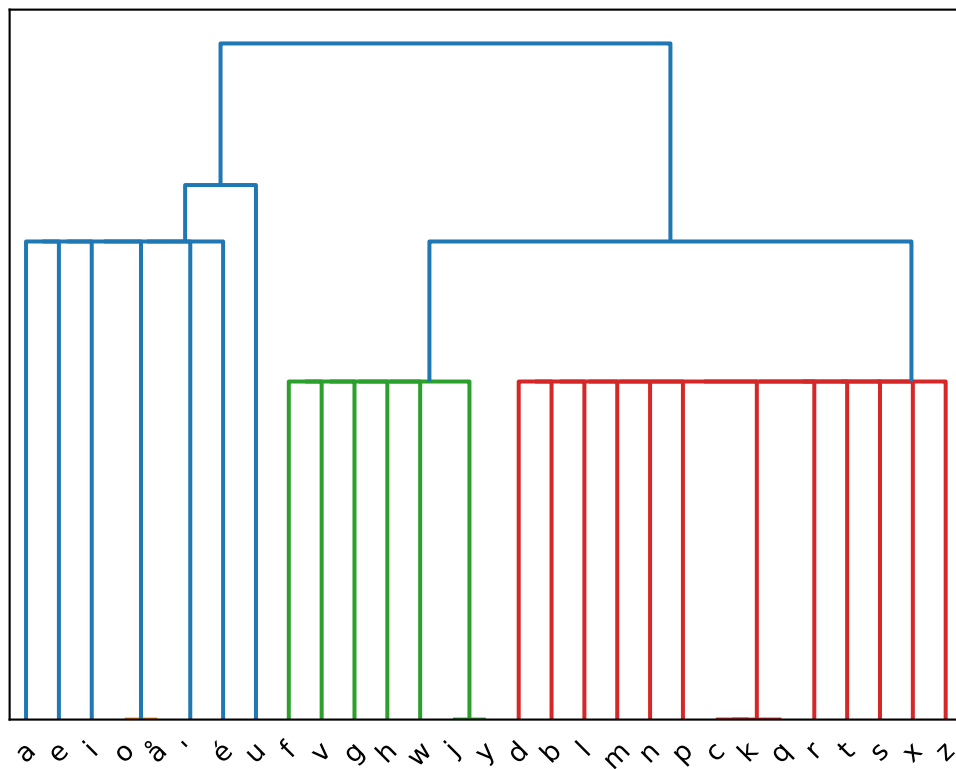

Supplement: software [file hierarchical-clusters-IPA-nl.pdf › acl-2022-code/clustering/hierarchical-clusters-IPA-nl.pdf]

Dutch

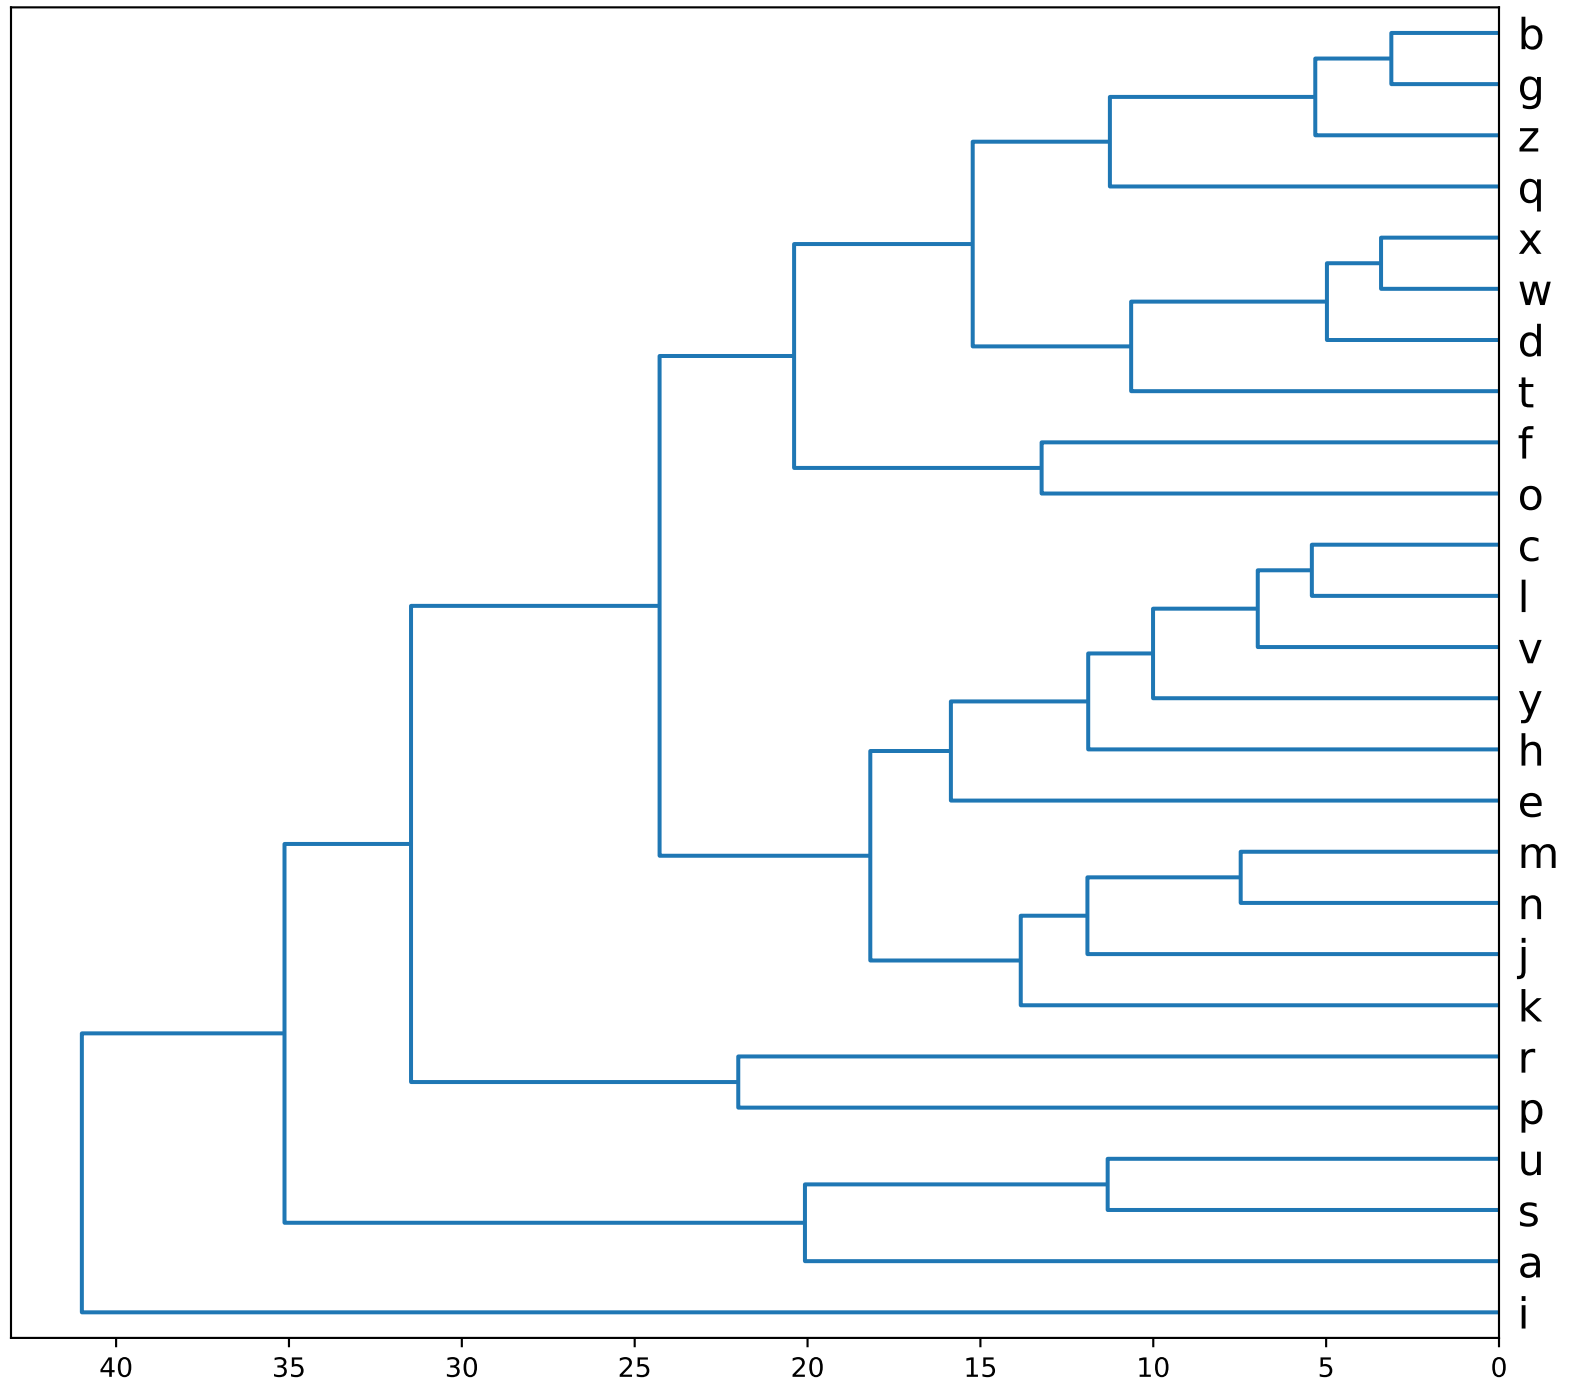

Supplement: software [file hierarchical-clusters-color-Dutch.pdf › acl-2022-code/clustering/hierarchical-clusters-color-Dutch.pdf]

# English

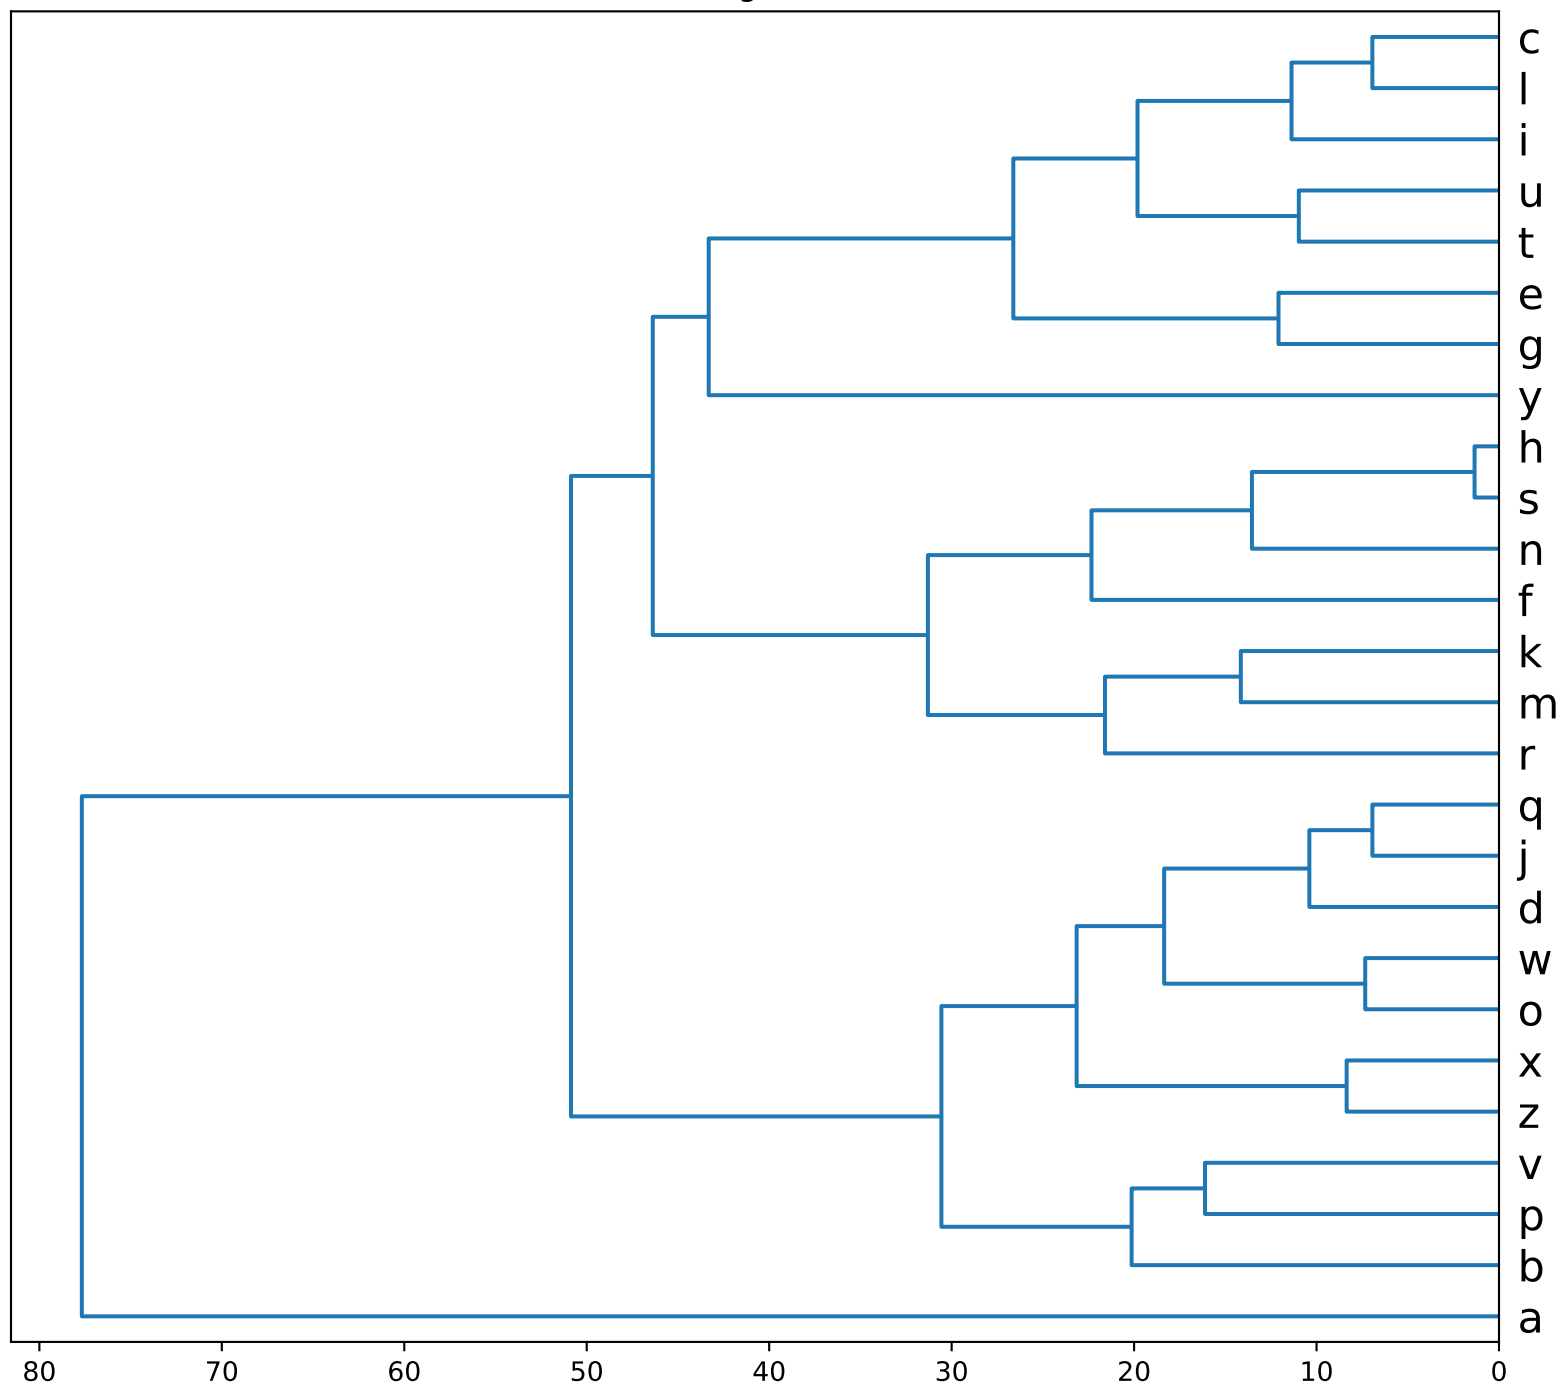

Supplement: software [file hierarchical-clusters-color-English.pdf › acl-2022-code/clustering/hierarchical-clusters-color-English.pdf]

# Japanese

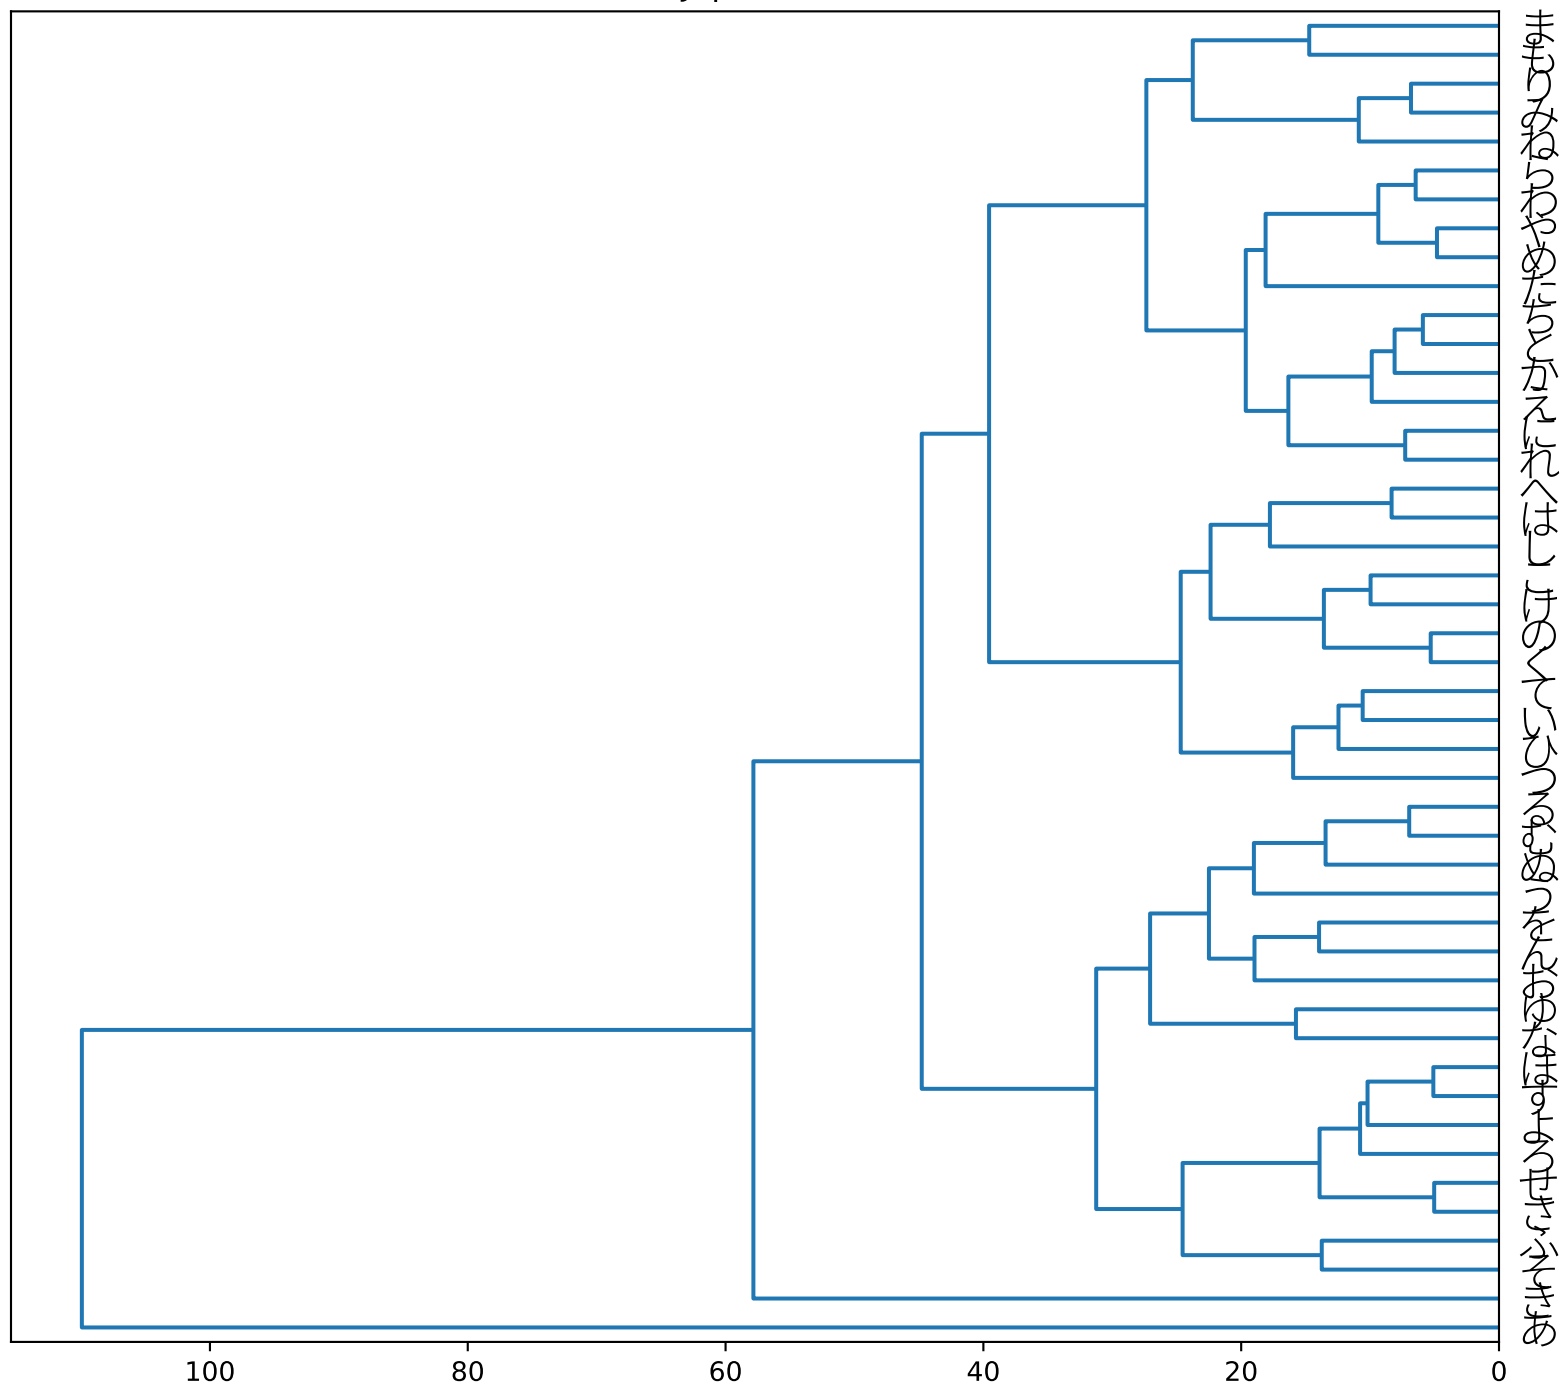

Supplement: software [file hierarchical-clusters-color-Japanese.pdf › acl-2022-code/clustering/hierarchical-clusters-color-Japanese.pdf]

Korean

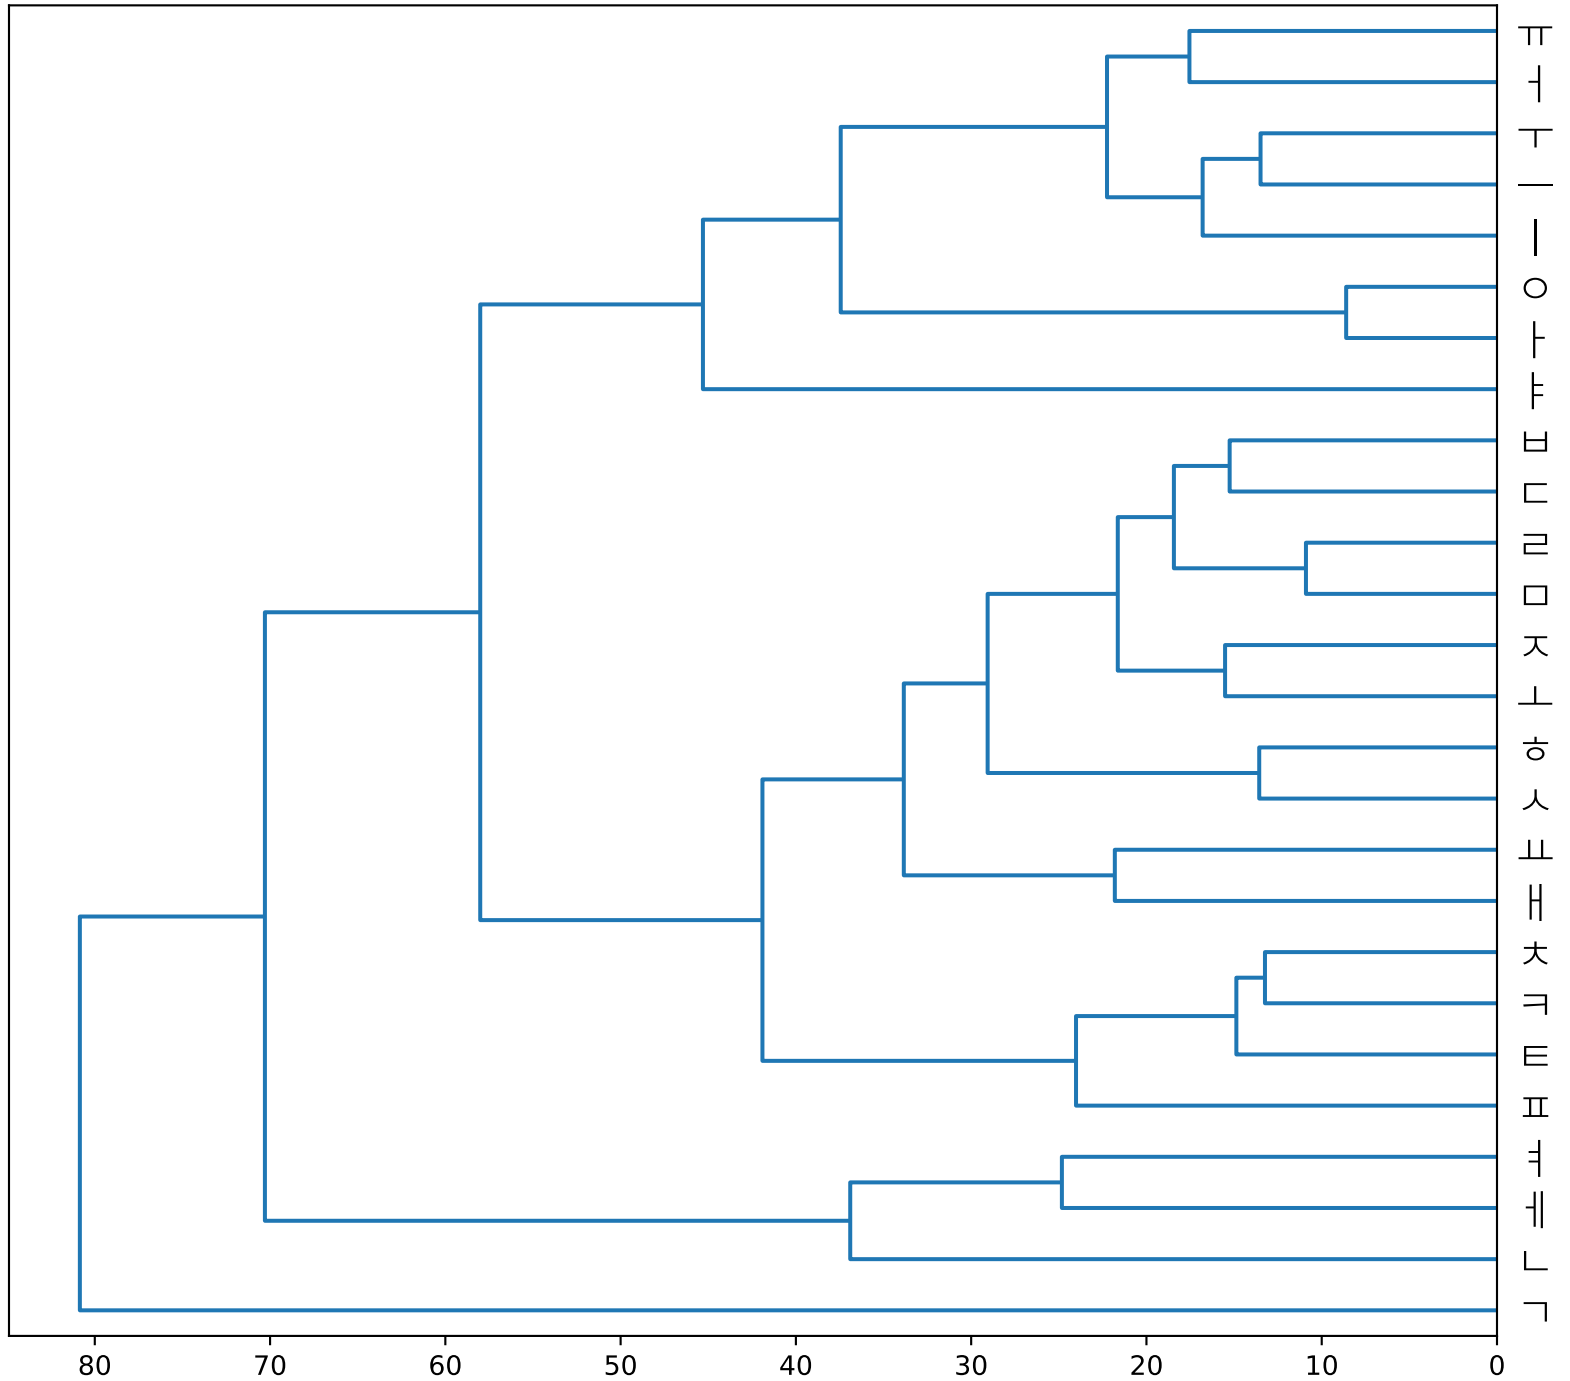

Supplement: software [file hierarchical-clusters-color-Korean.pdf › acl-2022-code/clustering/hierarchical-clusters-color-Korean.pdf]

# Spanish

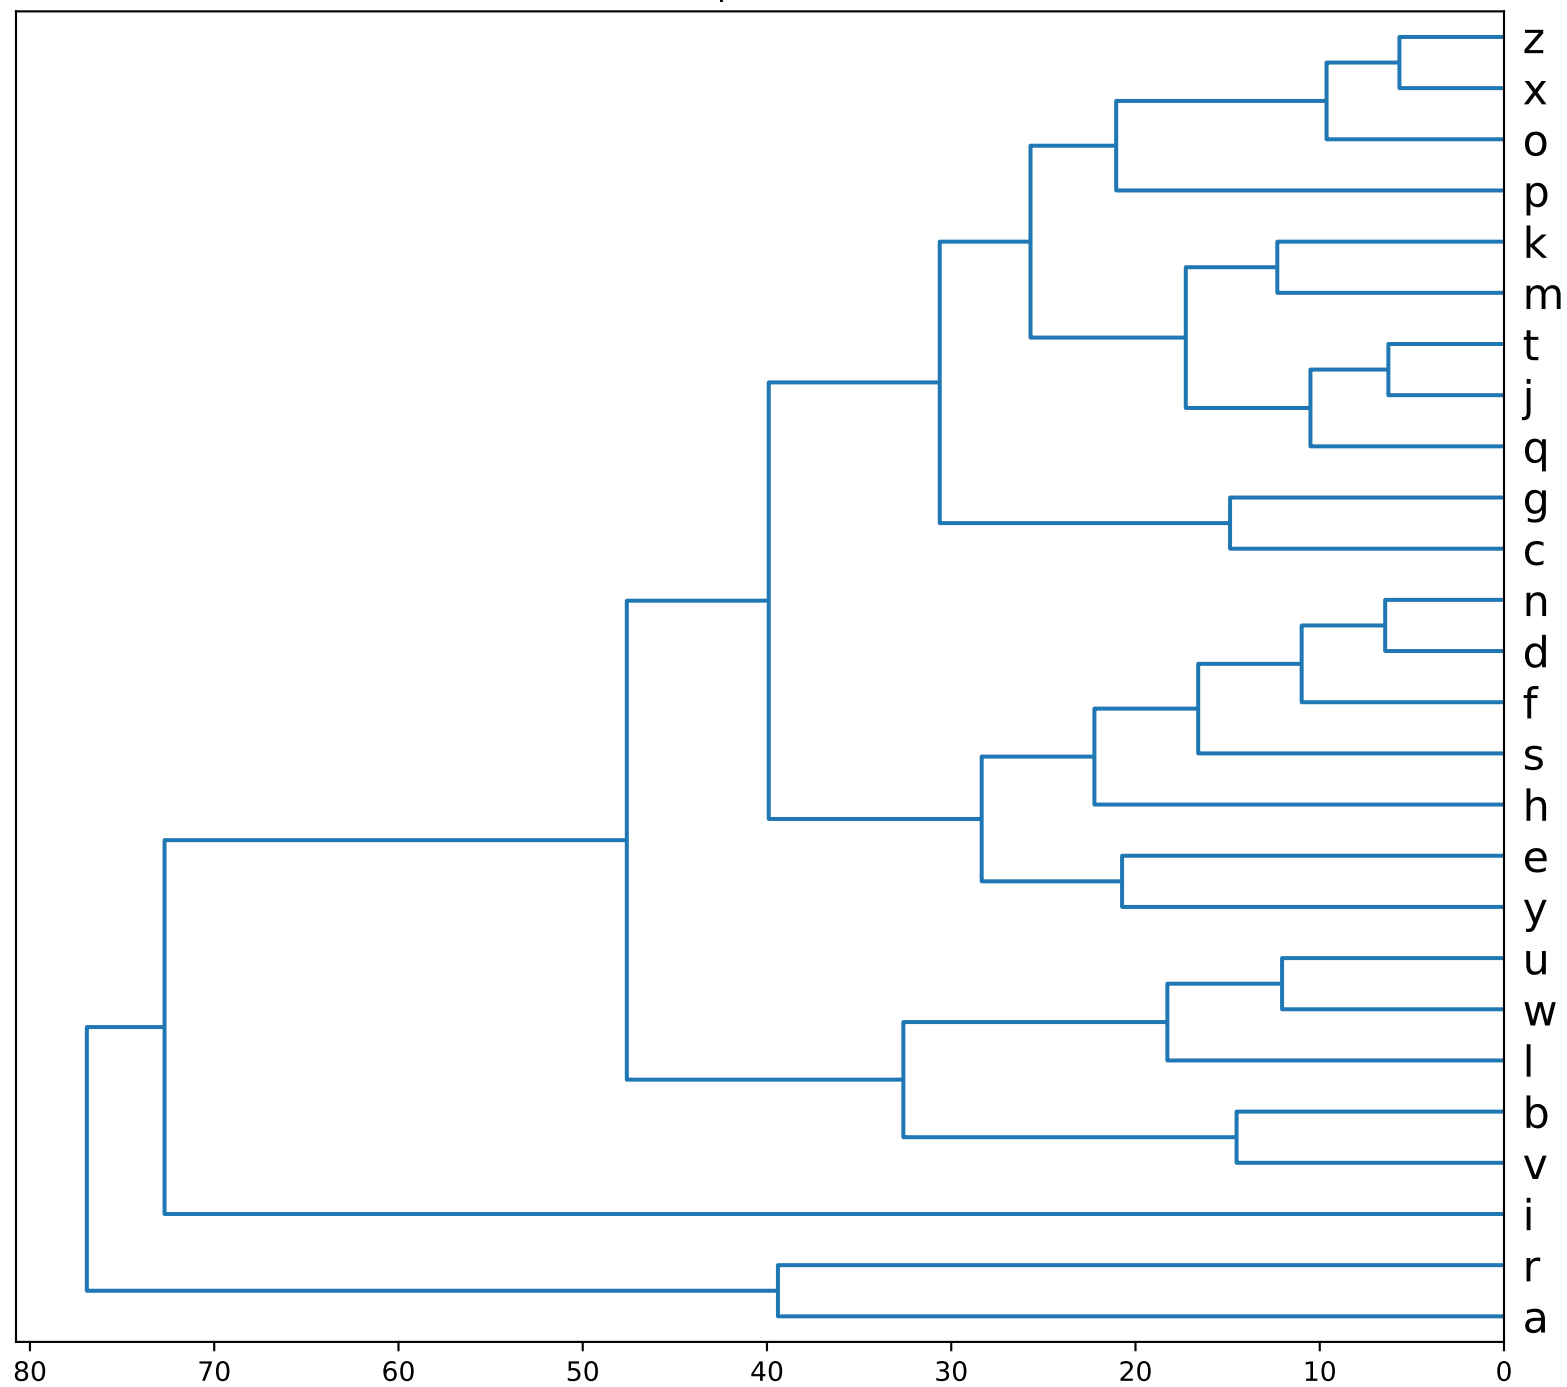

Supplement: software [file hierarchical-clusters-color-Spanish.pdf › acl-2022-code/clustering/hierarchical-clusters-color-Spanish.pdf]

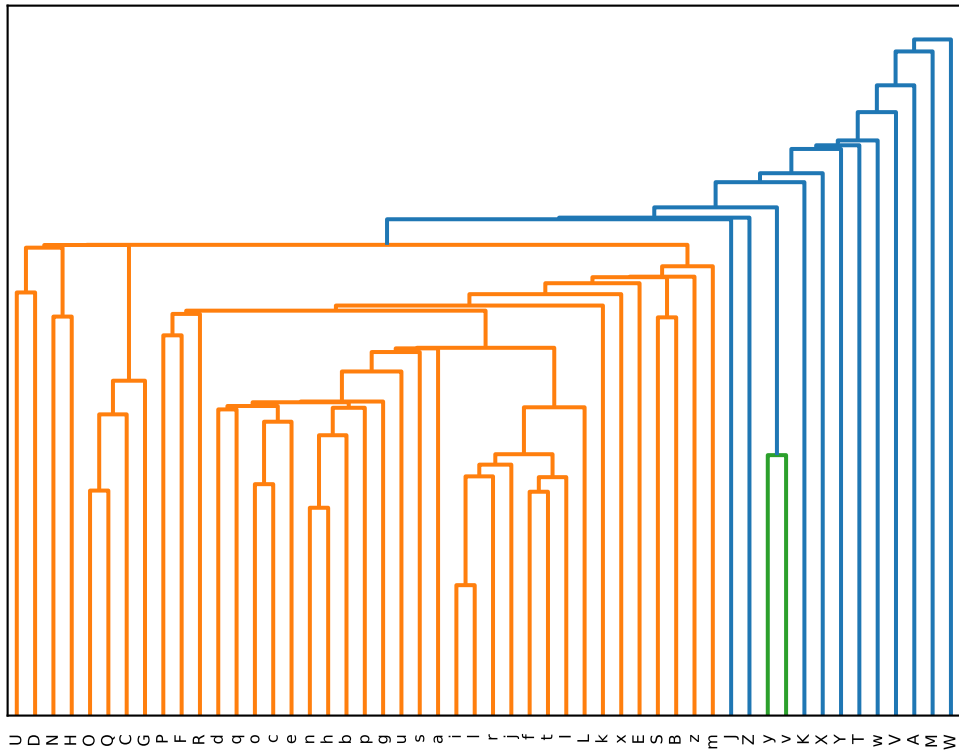

Supplement: software [file hierarchical-clusters-shape-en.pdf › acl-2022-code/clustering/hierarchical-clusters-shape-en.pdf]

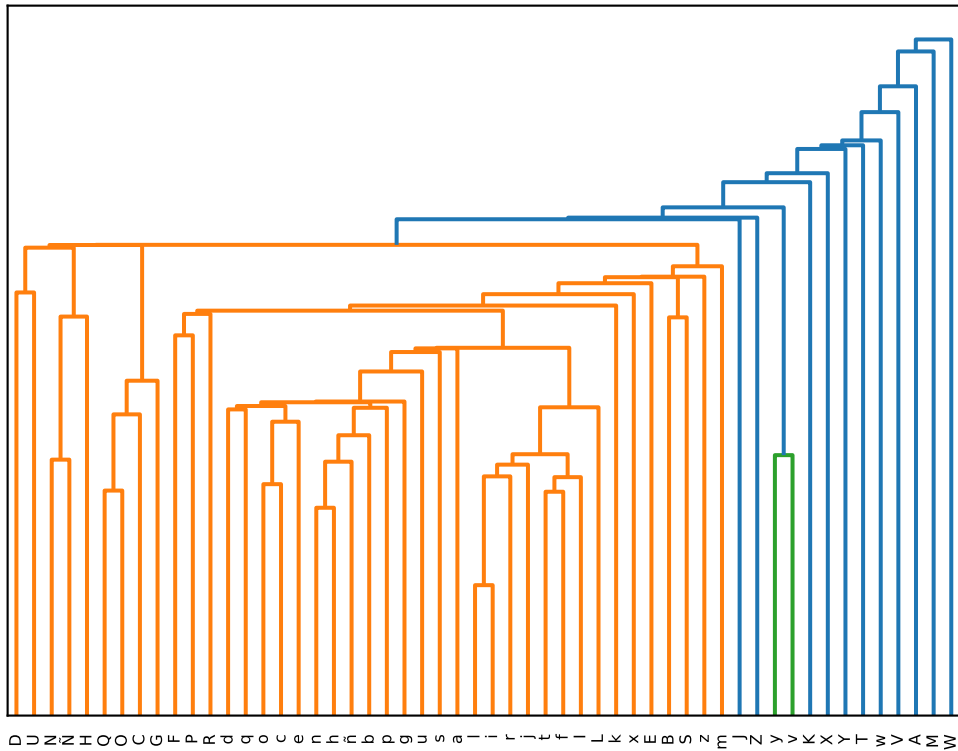

Supplement: software [file hierarchical-clusters-shape-es.pdf › acl-2022-code/clustering/hierarchical-clusters-shape-es.pdf]

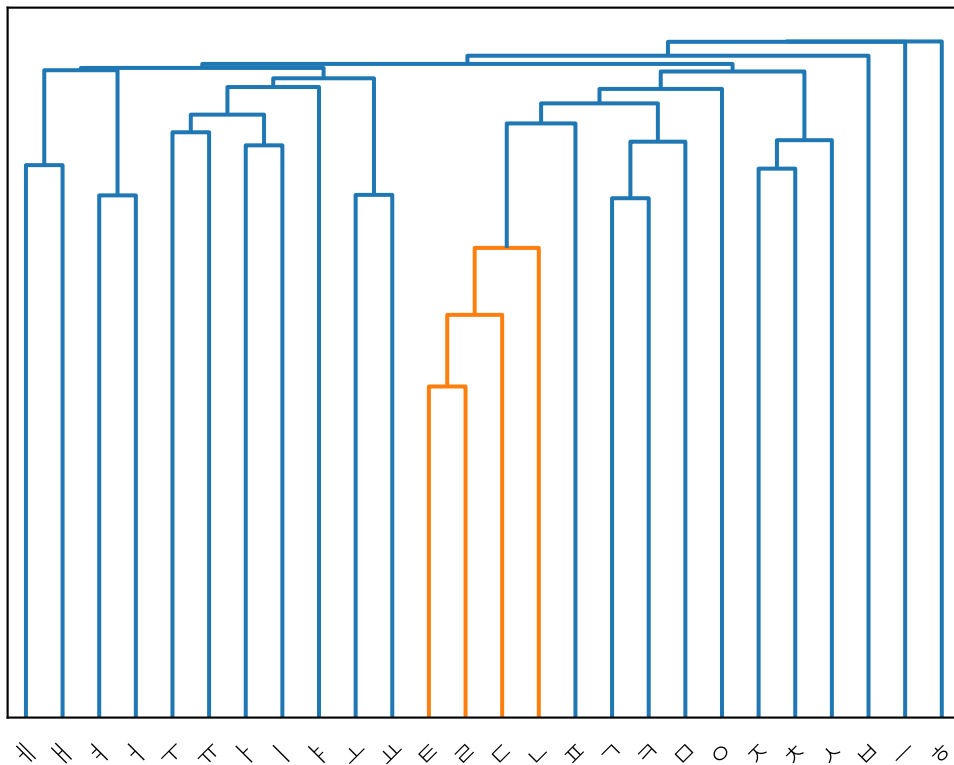

Supplement: software [file hierarchical-clusters-shape-ko.pdf › acl-2022-code/clustering/hierarchical-clusters-shape-ko.pdf]



Supplement: software [file hierarchical-clusters-shape-nl.pdf › acl-2022-code/clustering/hierarchical-clusters-shape-nl.pdf]

# RANDOM

lstm

transformer

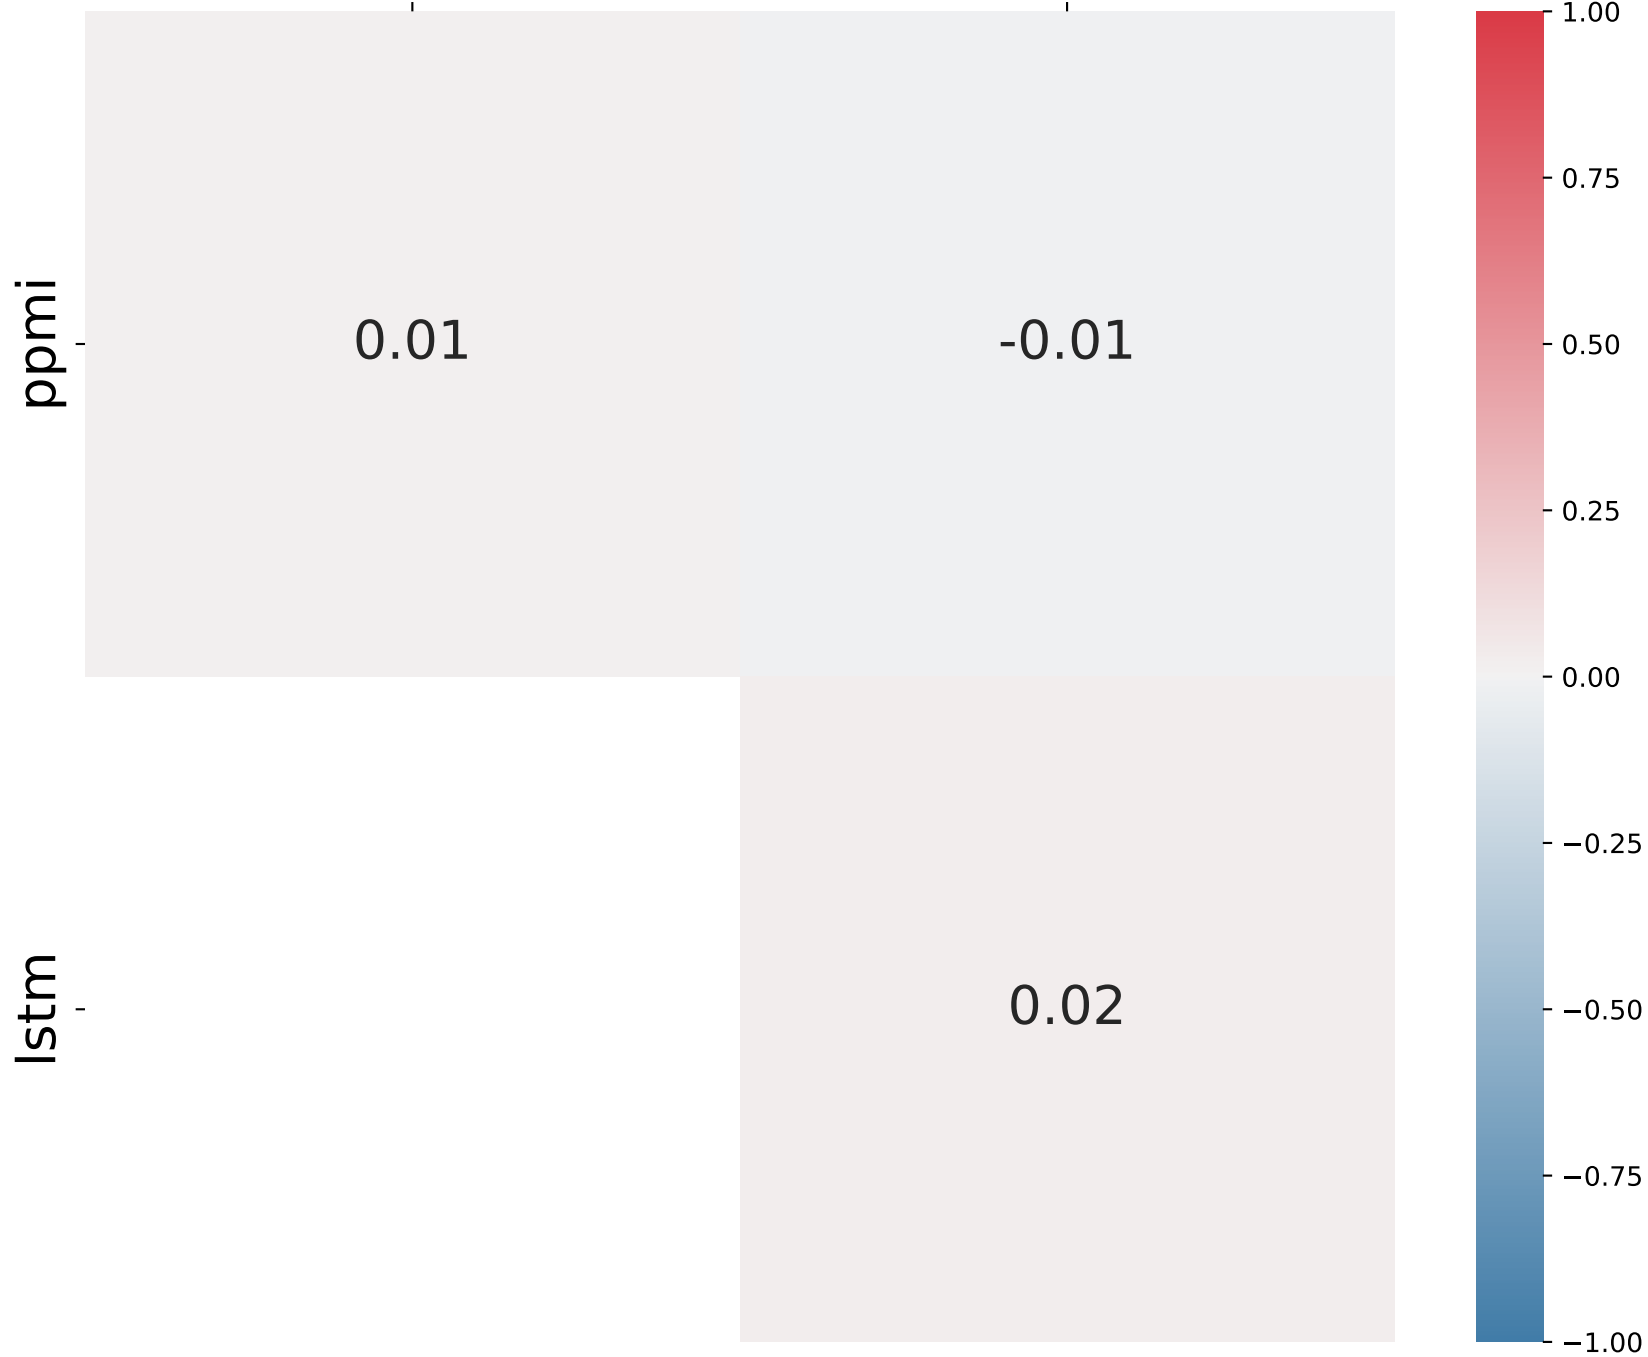

Supplement: software [file RANDOM-correlations.pdf › acl-2022-code/plots/RANDOM-correlations.pdf]

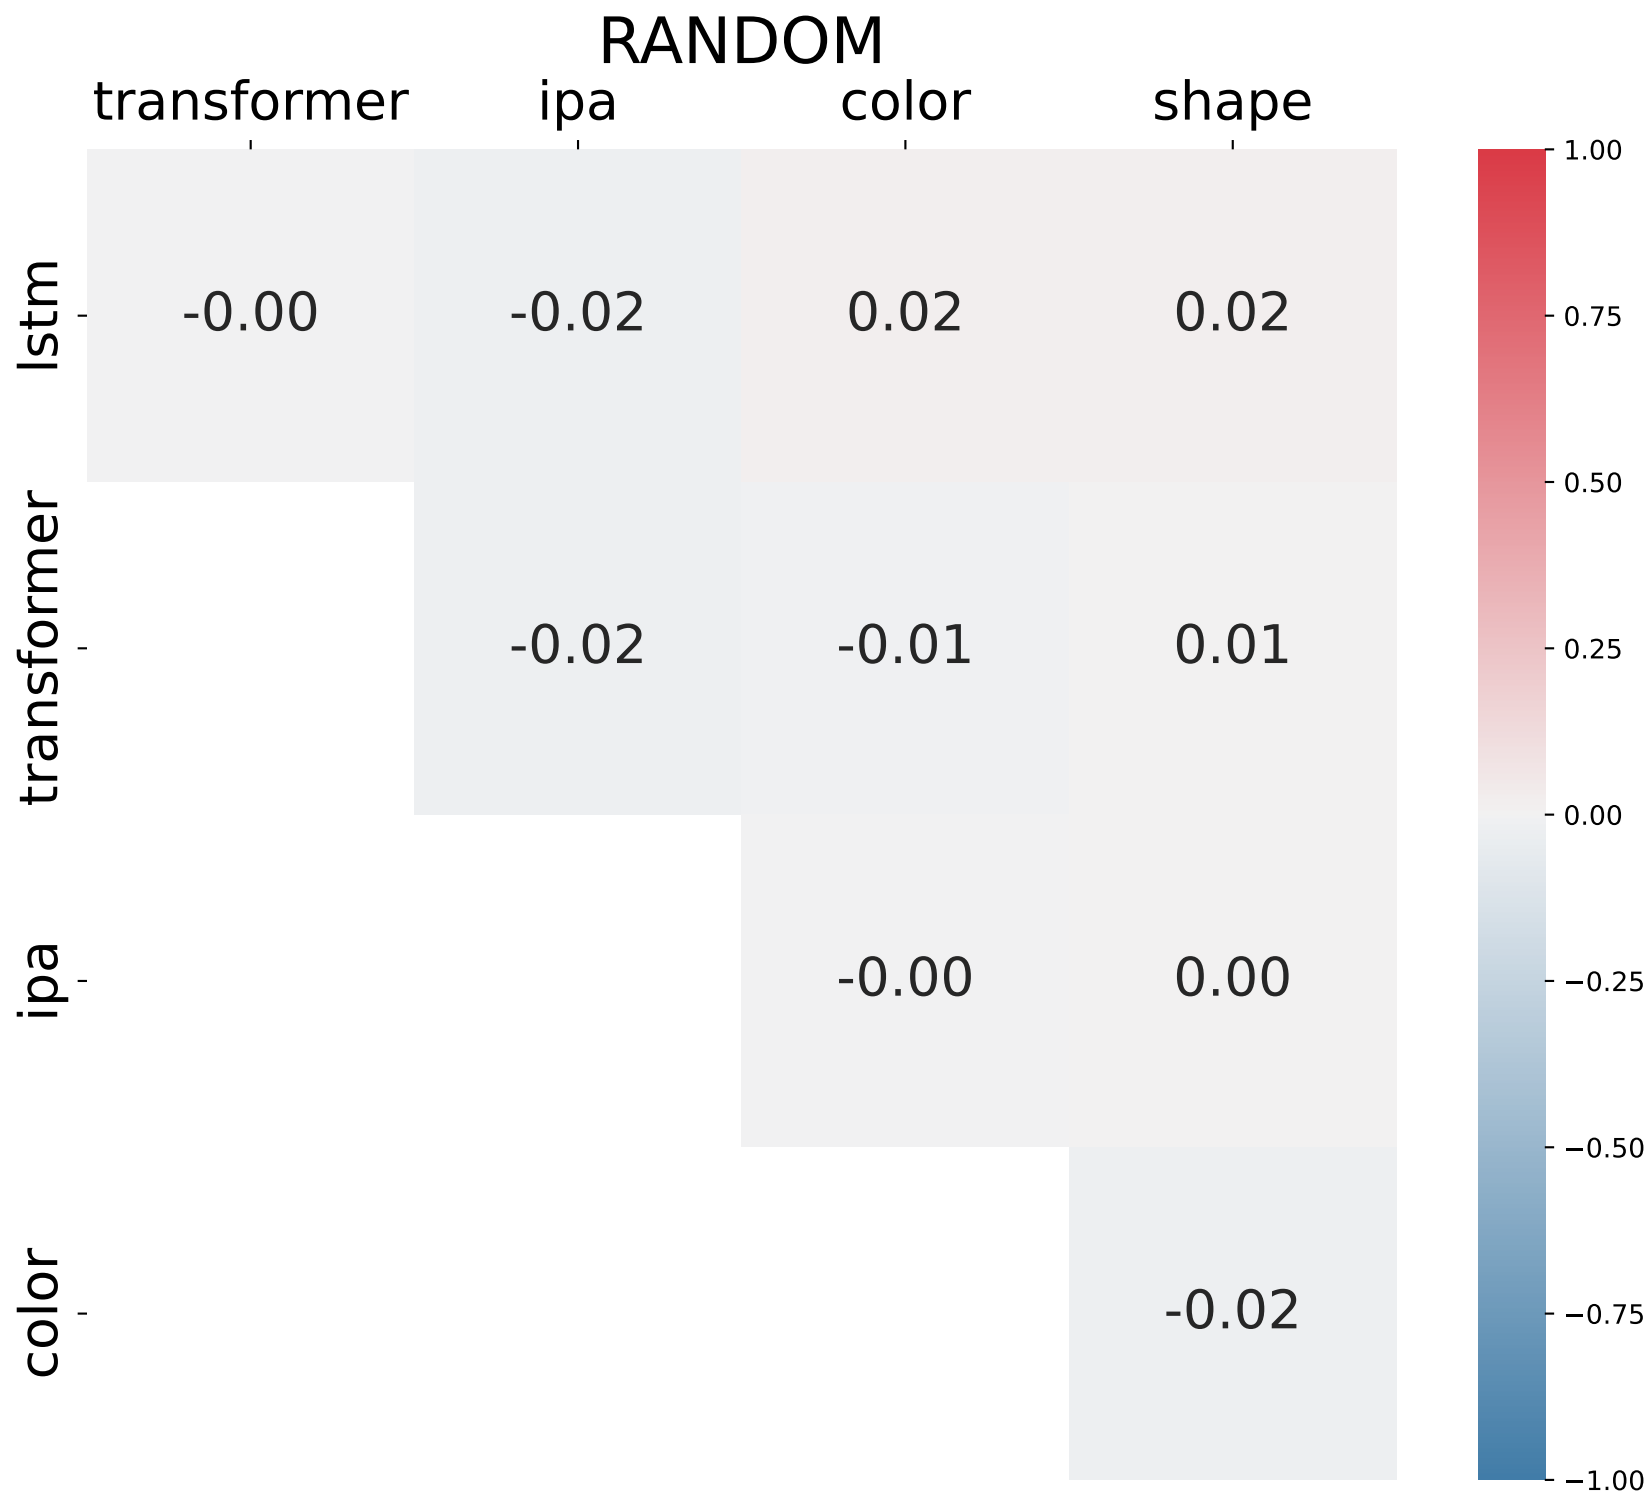

Supplement: software [file RANDOM-correlations.pdf › acl-2022-code/plots/nora/RANDOM-correlations.pdf]

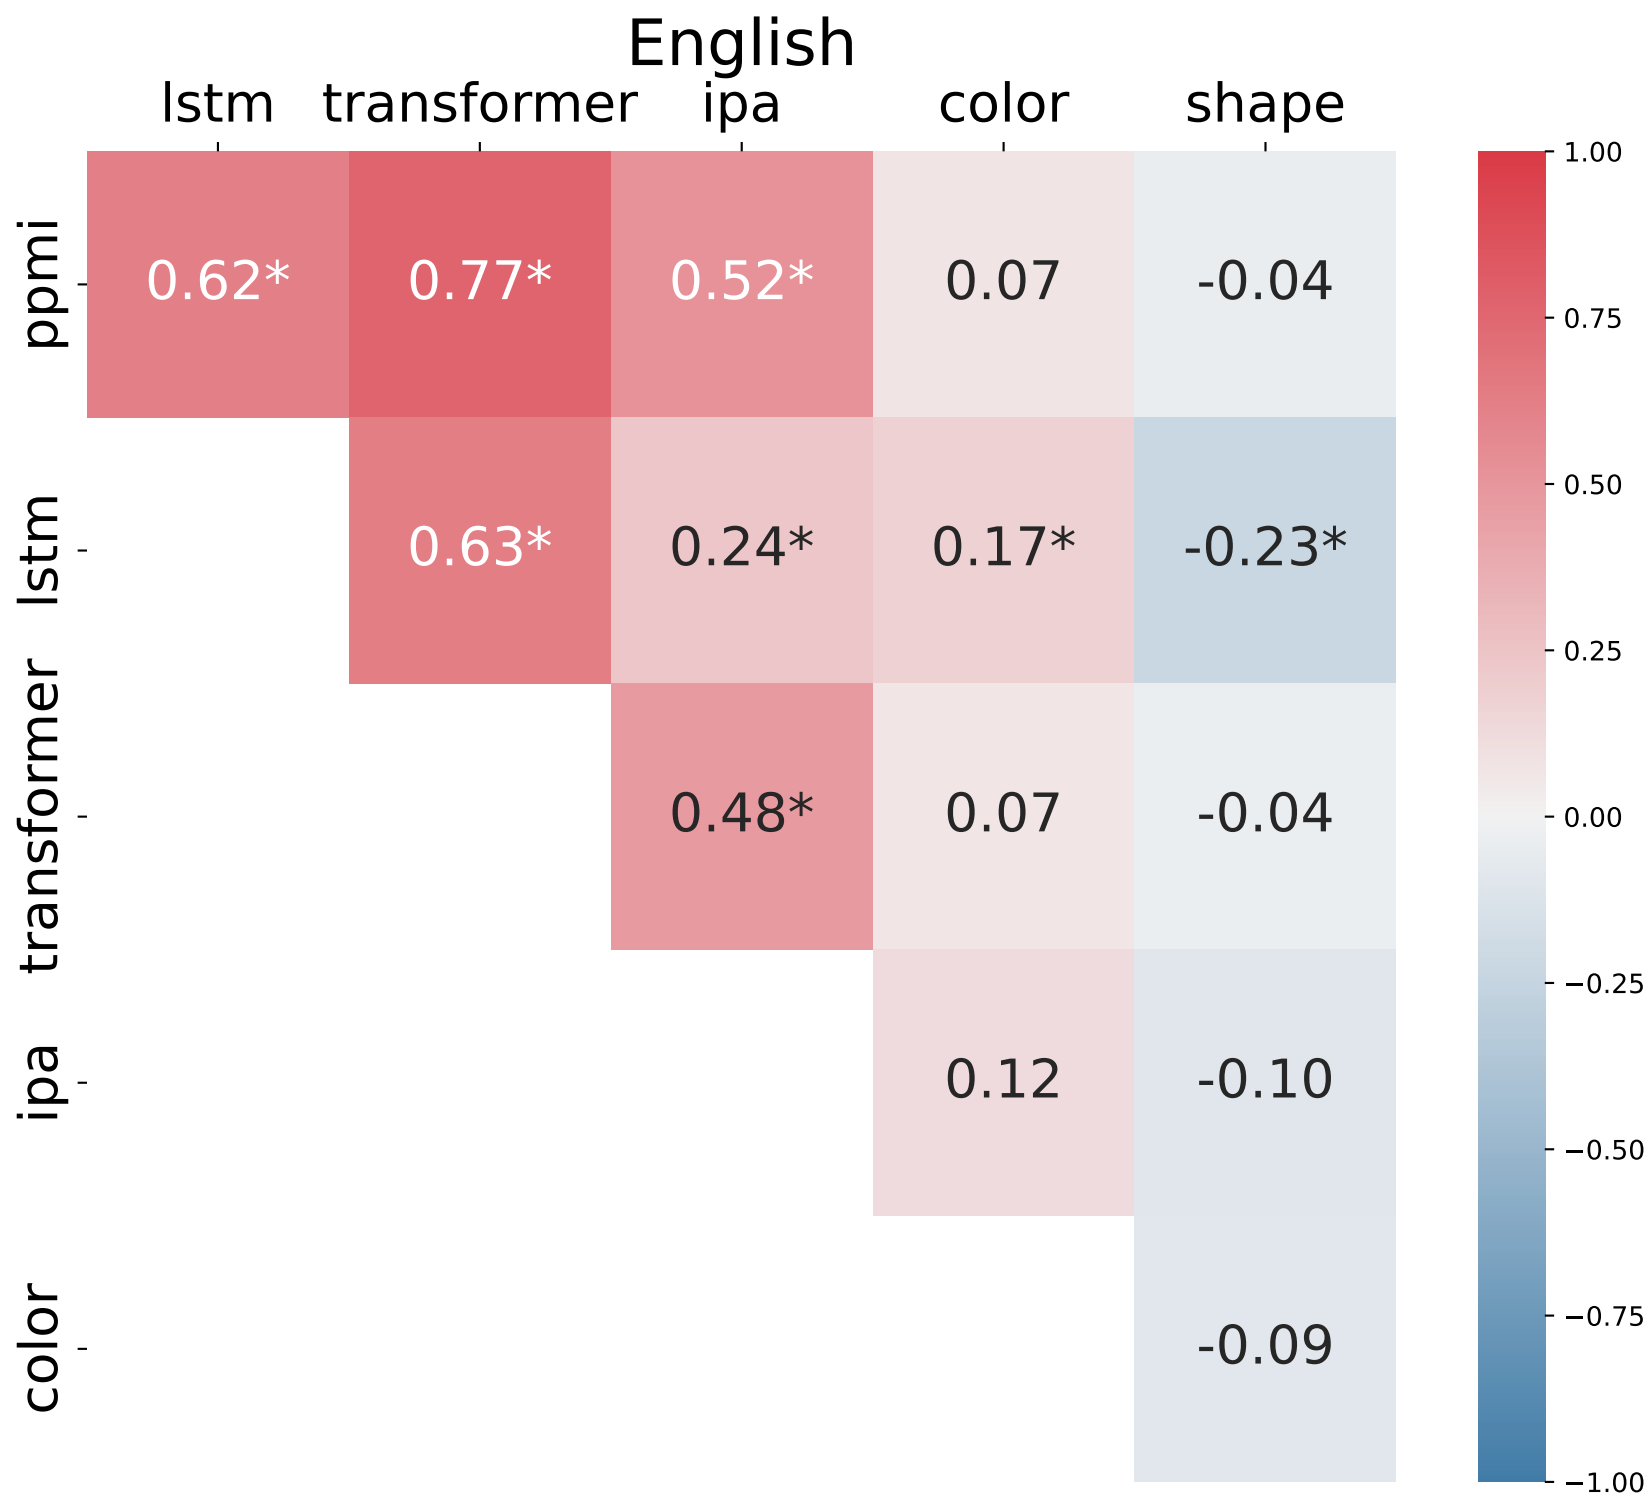

Supplement: software [file en-correlations.pdf › acl-2022-code/plots/nora/en-correlations.pdf]

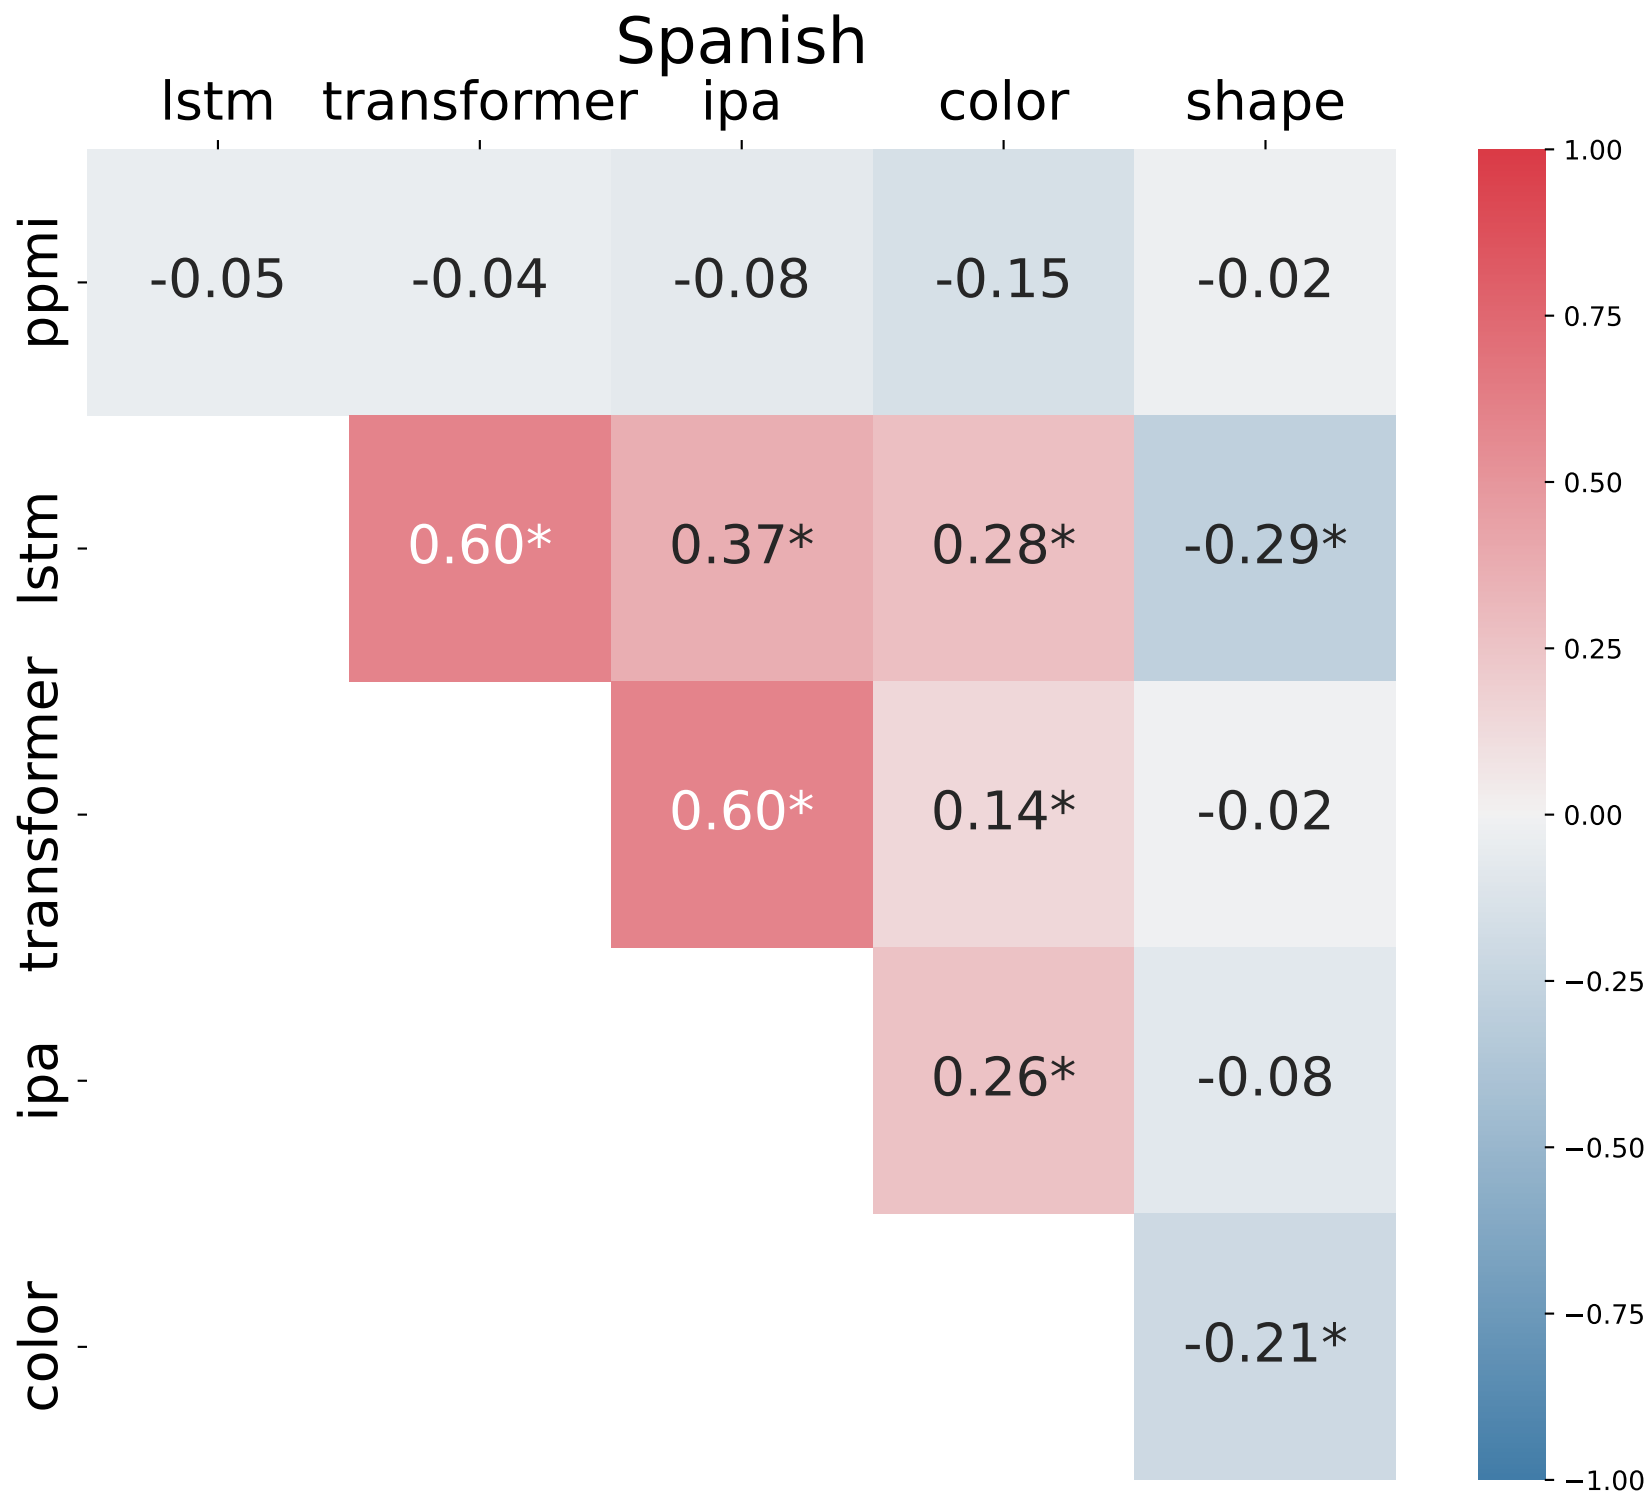

Supplement: software [file es-correlations.pdf › acl-2022-code/plots/nora/es-correlations.pdf]

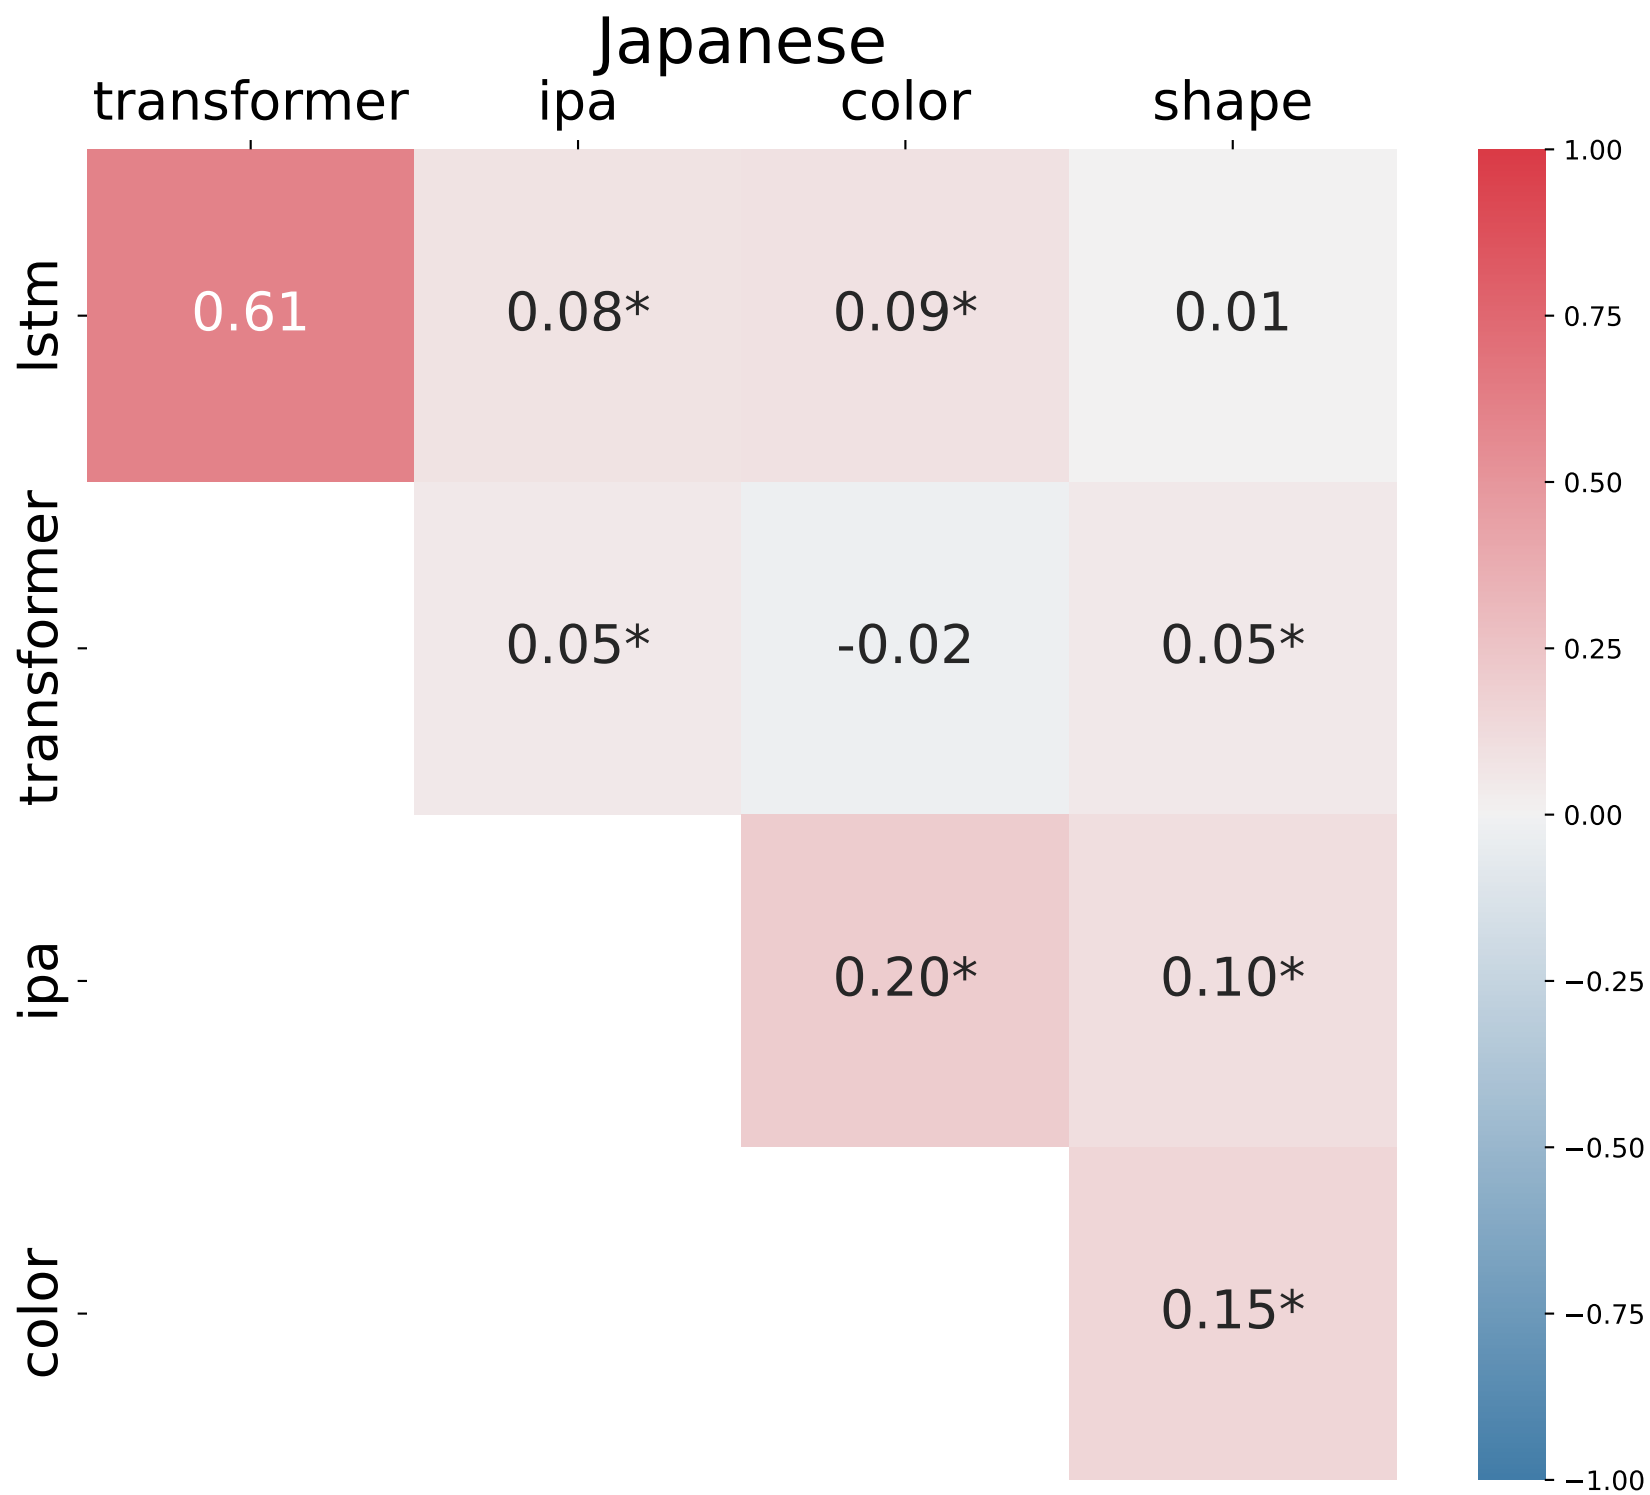

Supplement: software [file ja-correlations.pdf › acl-2022-code/plots/nora/ja-correlations.pdf]

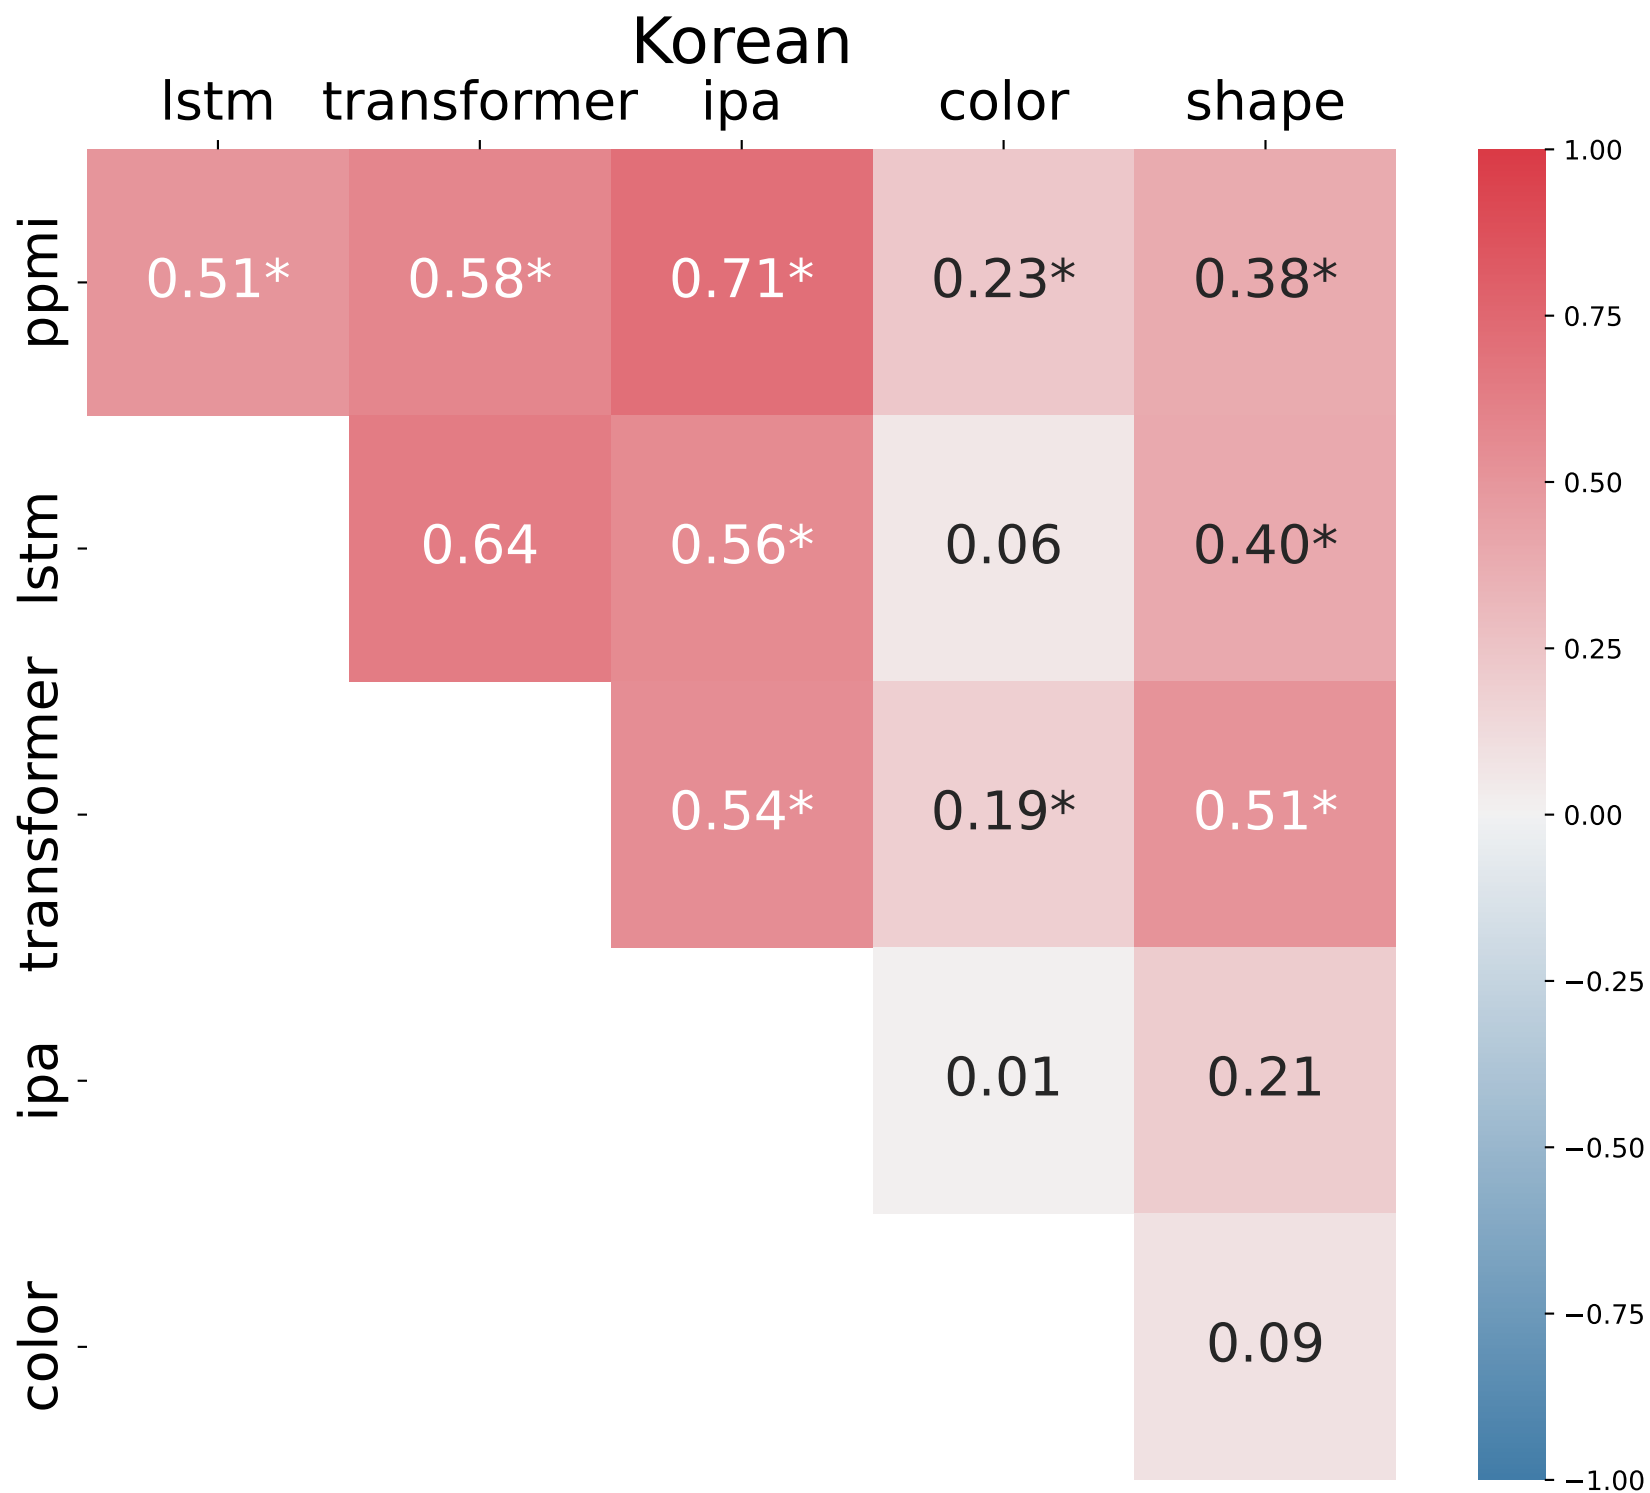

Supplement: software [file ko-correlations.pdf › acl-2022-code/plots/nora/ko-correlations.pdf]

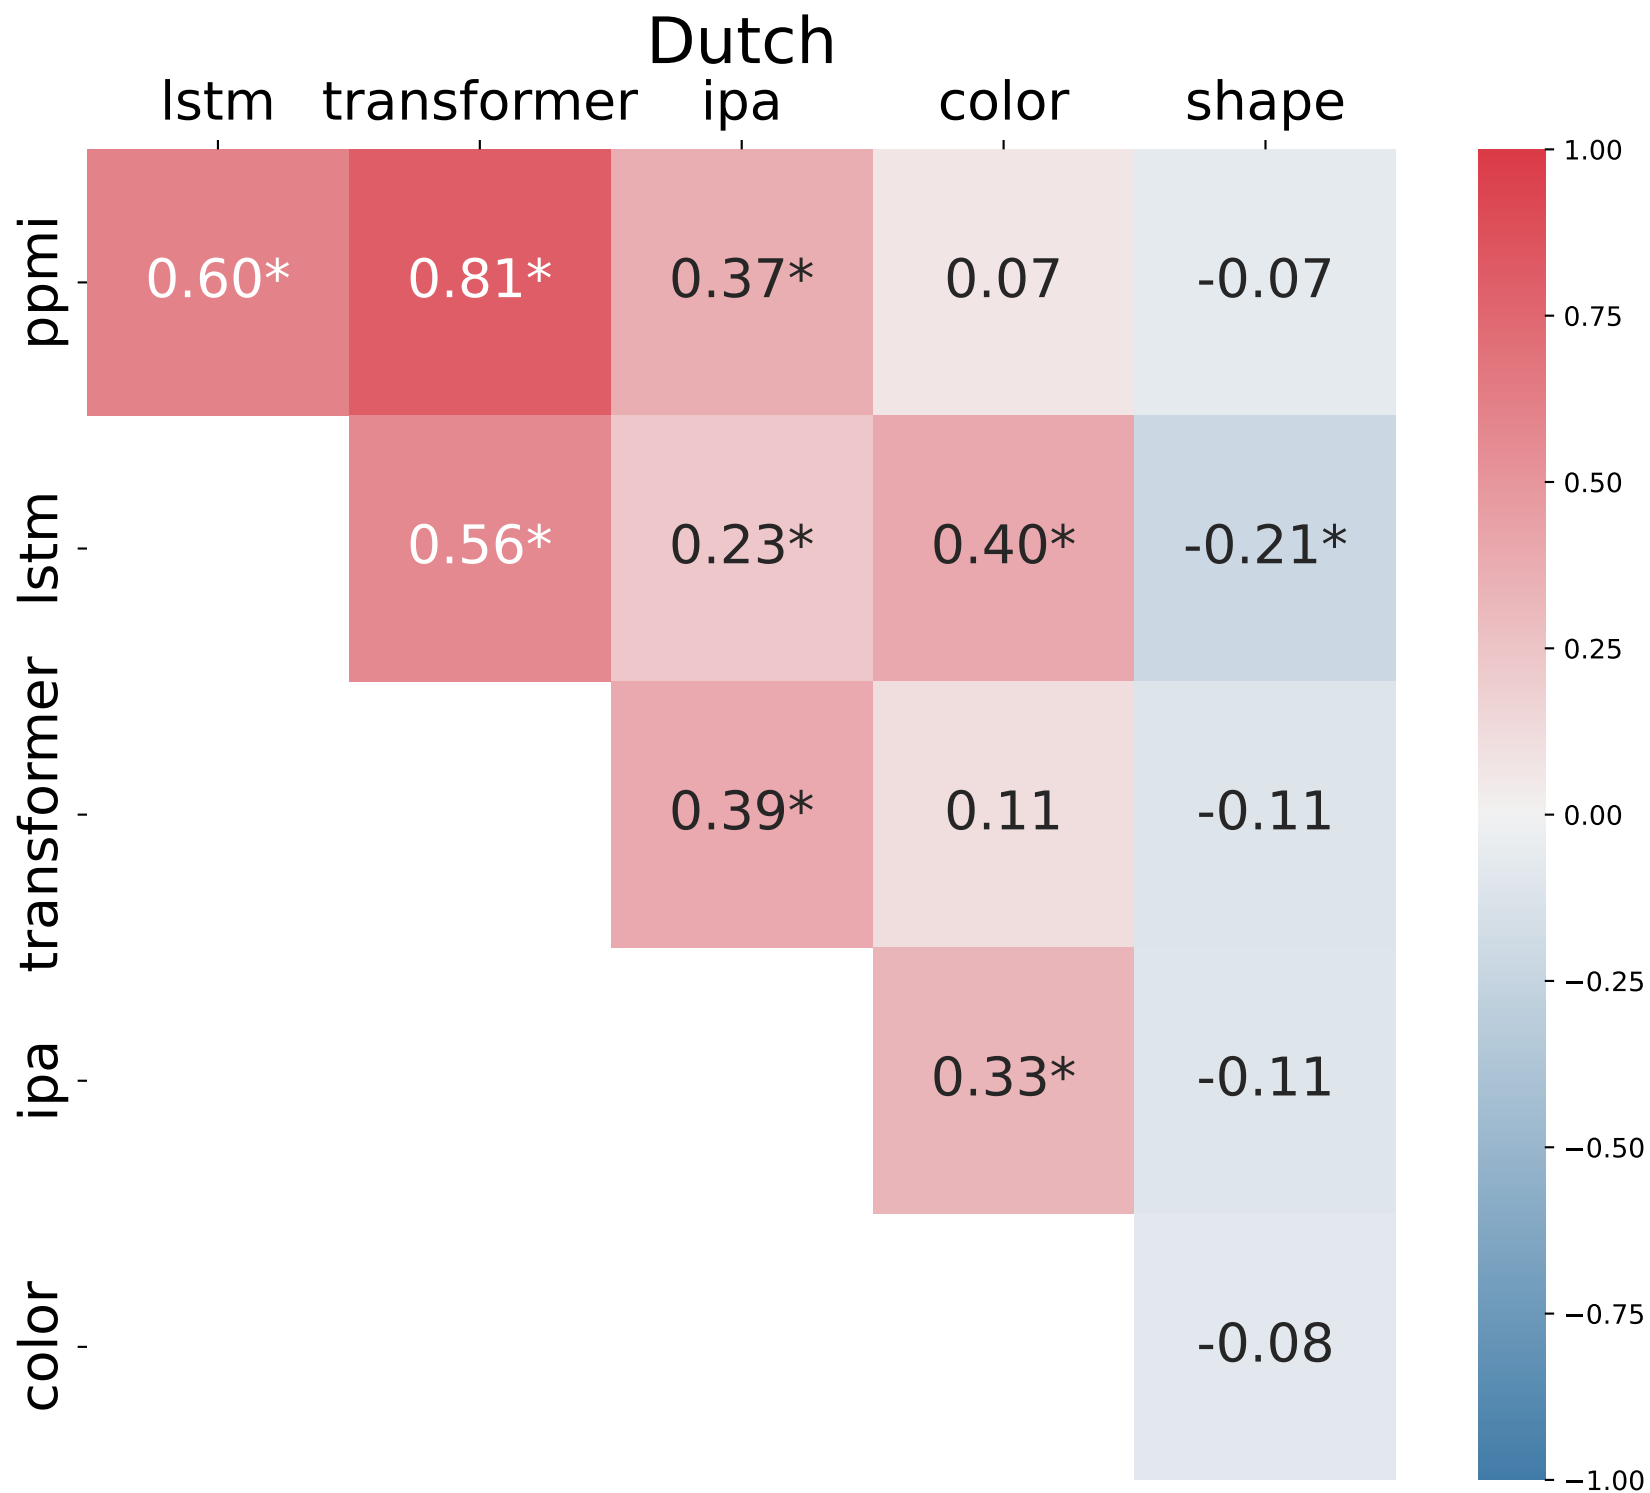

Supplement: software [file nl-correlations.pdf › acl-2022-code/plots/nora/nl-correlations.pdf]
